# Supplementary material for: Synthesis of methyl 2-cyano-3,12-dioxo-18β-olean-1,9(11)-dien-30-oate analogues to determine the active groups for inhibiting cell growth and inducing apoptosis in leukemia cells
Source: Royal Society of Chemistry journal article supplement (doi:10.1039/c4ob00703d), 2014-06-27
Supplement: c4ob00703d1.pdf [file c4ob00703d1.pdf]

## Synthesis of methyl 2-cyano-3,12-dioxo-18 $\beta$ -olean-1,9(11)-dien-30-oate analogues to determine the active groups of inhibiting cell growth and inducing apoptosis in leukemia cells

Xiaojing Li,<sup>a</sup> Yuetong Wang,<sup>b</sup> Yuan Gao,<sup>a</sup> Lei Li,<sup>b</sup> Xin Guo,<sup>b</sup> Dan Liu,<sup>a</sup> Yongkui Jing,<sup>\*c</sup> and Linxiang Zhao<sup>\*a</sup>

<sup>a</sup> Key Laboratory of Structure-Based Drug Design & Discovery of Ministry of Education, Shenyang Pharmaceutical University, Shenyang-110016, China.

Fax: (+86) 24 2398 6420; Tel: (+86) 24 2398 6420;

E-mail: linxiang.zhao@vip.sina.com

<sup>b</sup> Department of Pharmacology, Shenyang Pharmaceutical University, Shenyang, 110016, China.

<sup>c</sup> Department of Medicine, Mount Sinai School of Medicine, New York NY 10029, USA. E-mail: yongkui.jing@mssm.edu

### The NMR spectra data of target compounds

|                   |    |
|-------------------|----|
| Compound 10a..... | 2  |
| Compound 10b..... | 4  |
| Compound 10c..... | 6  |
| Compound 10d..... | 8  |
| Compound 10e..... | 10 |
| Compound 11a..... | 14 |
| Compound 11c..... | 16 |
| Compound 11d..... | 18 |
| Compound 12.....  | 20 |
| Compound 13.....  | 22 |
| Compound 9a.....  | 24 |
| Compound 9b.....  | 25 |
| Compound 9c.....  | 26 |
| Compound 9d.....  | 27 |
| Compound 5e.....  | 28 |
| Compound 7c.....  | 28 |
| Compound 7e.....  | 29 |
| Compound 8c.....  | 30 |
| Compound 8e.....  | 31 |

Compound 10a

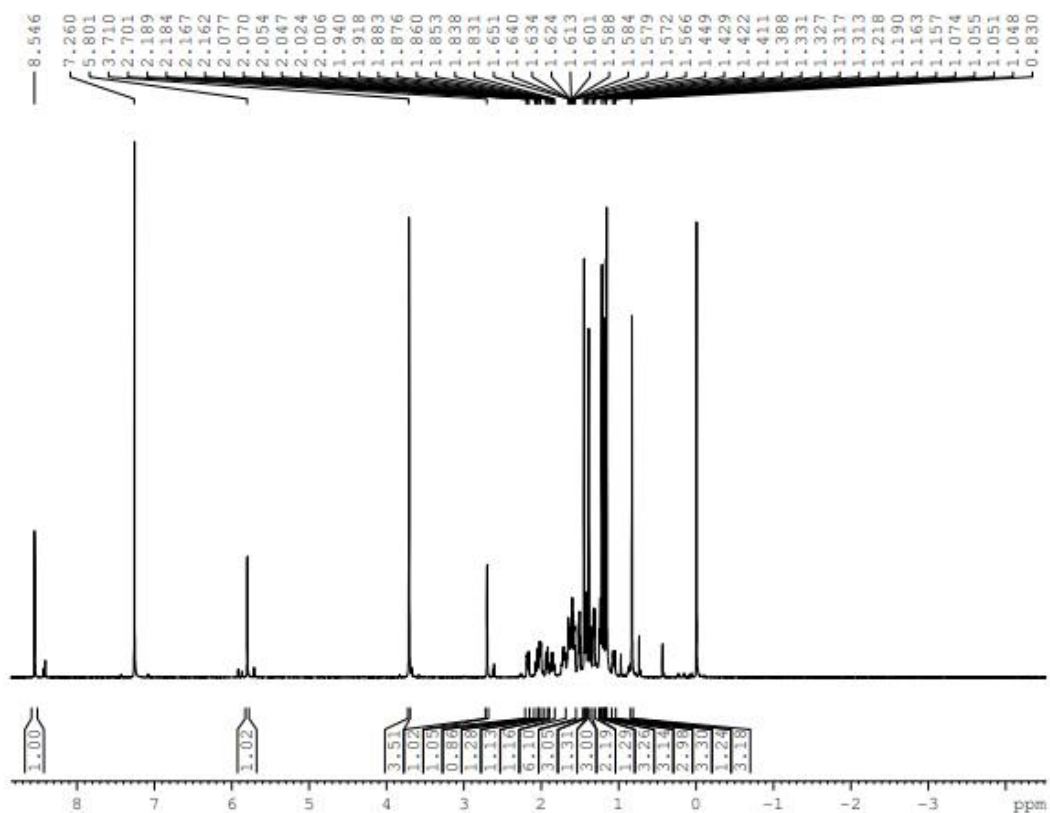

<sup>1</sup>H NMR spectra of compound 10a

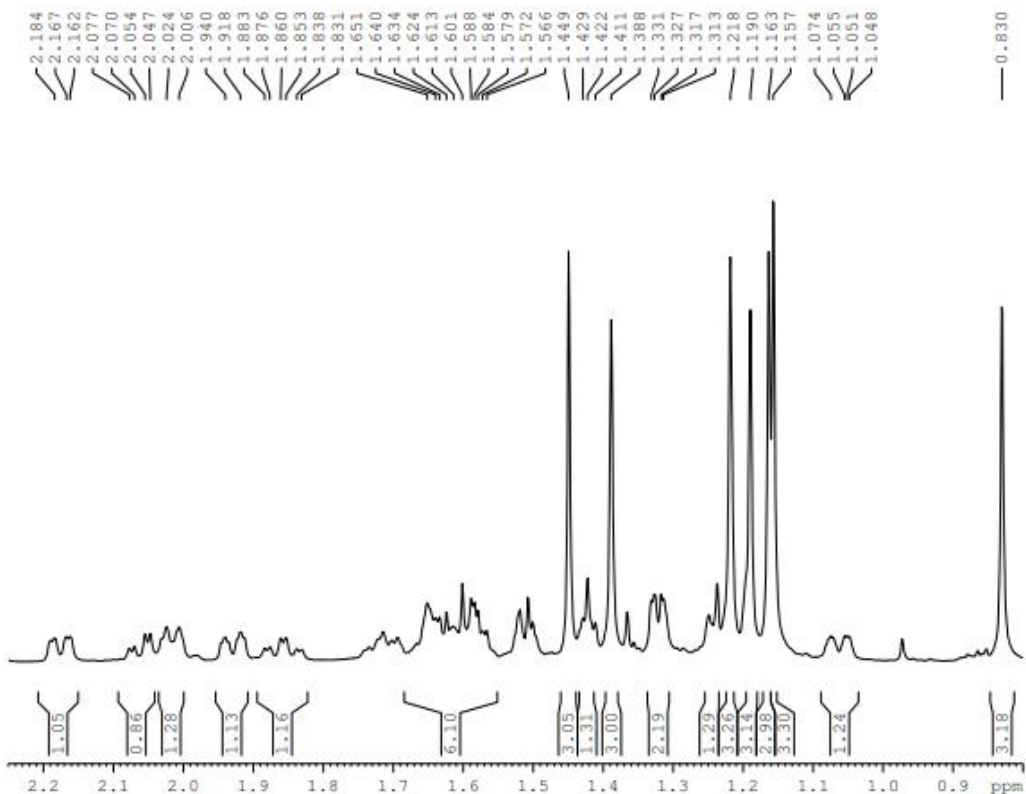

<sup>1</sup>H NMR spectra of compound 10a

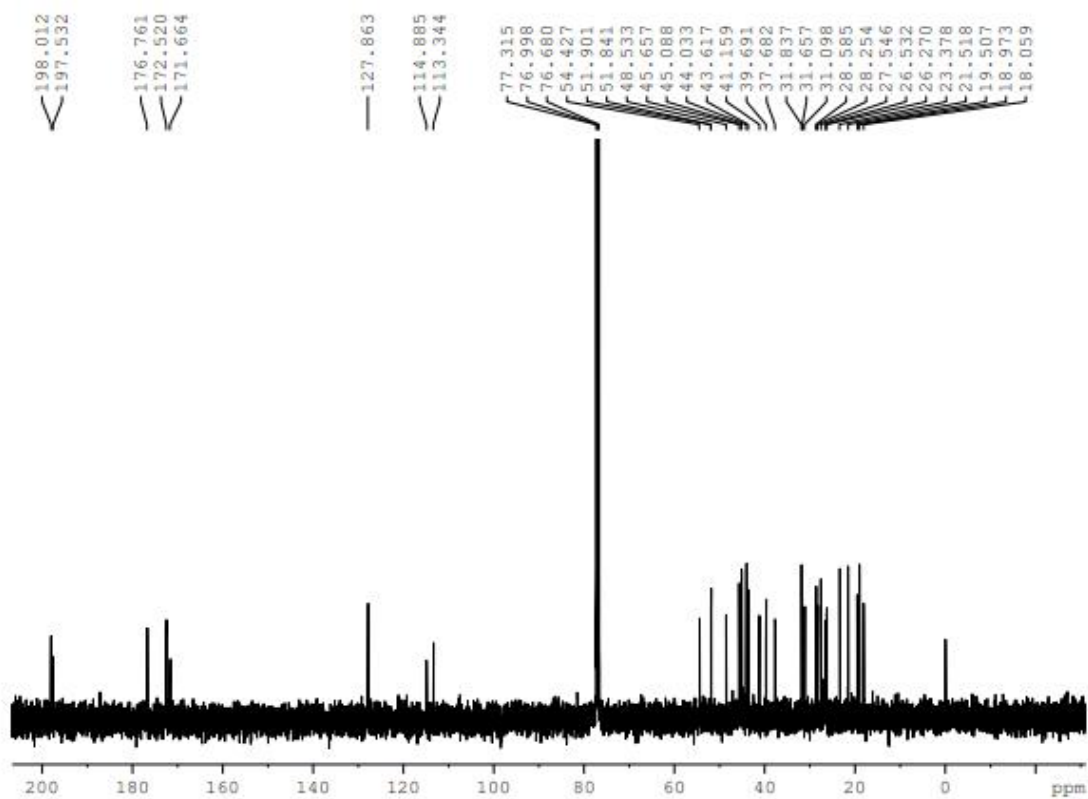

$^{13}\text{C}$  NMR spectra of compound **10a**

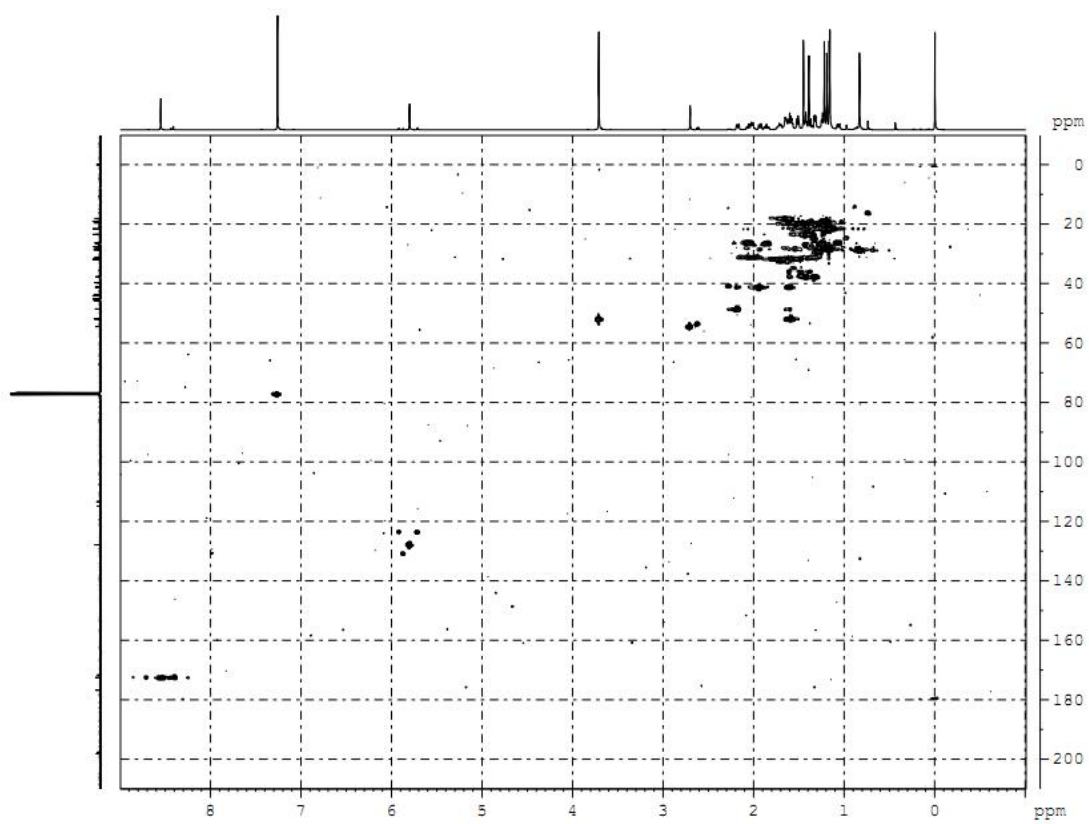

HSQC spectra of compound **10a**

Compound 10b

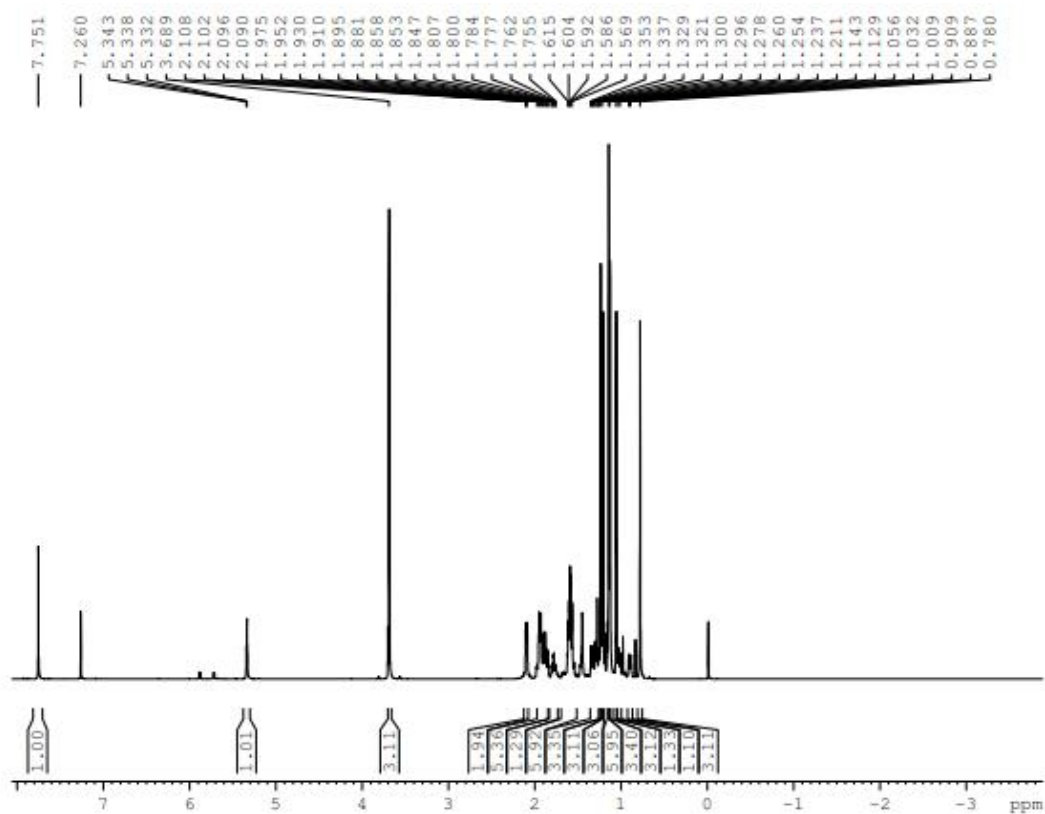

<sup>1</sup>H NMR spectra of compound 10b

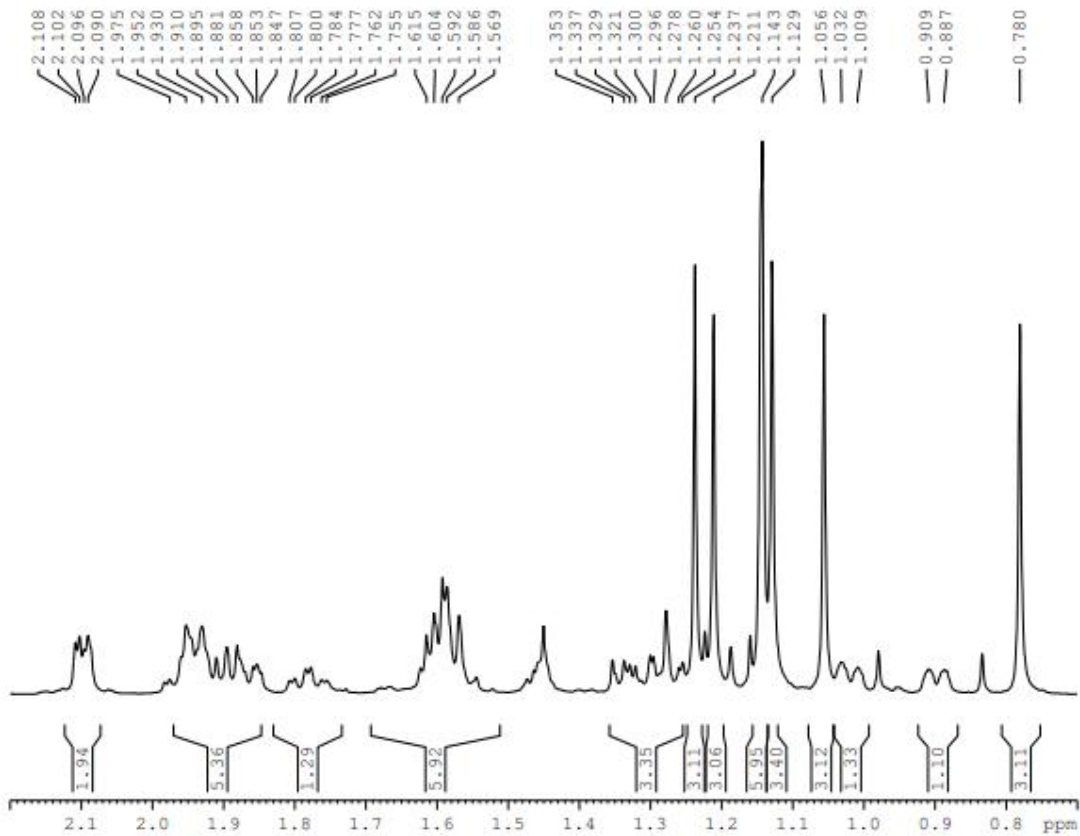

<sup>1</sup>H NMR spectra of compound 10b

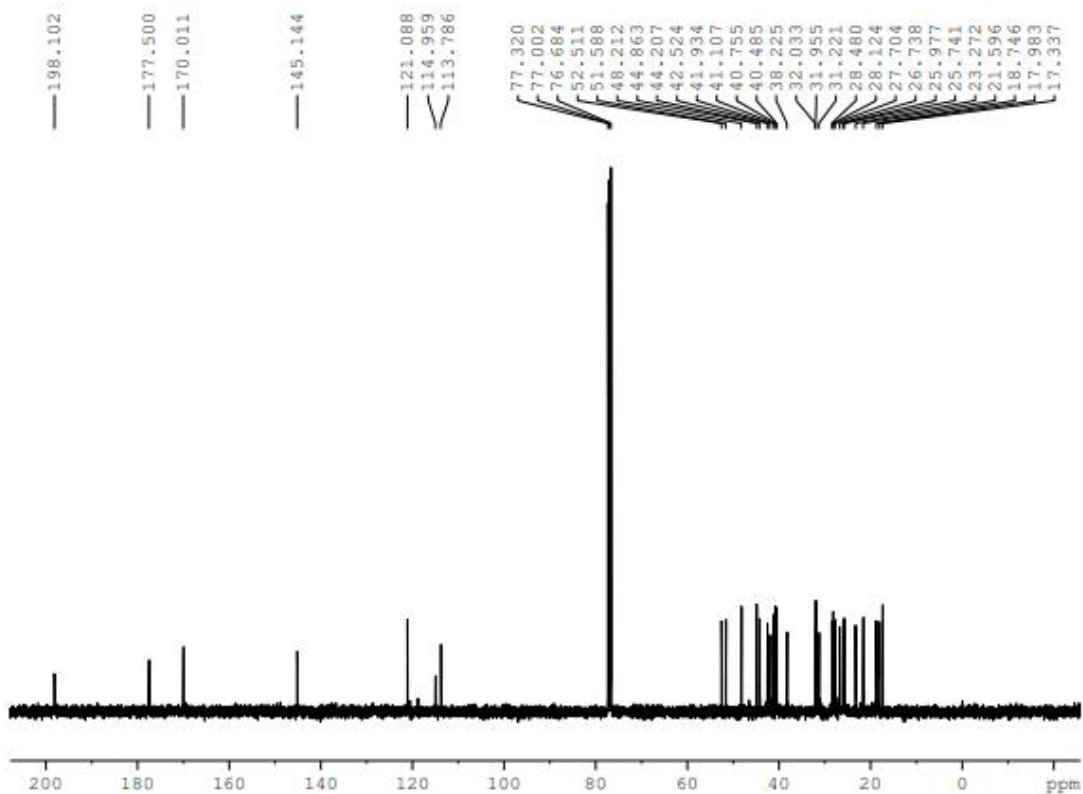

$^{13}\text{C}$  NMR spectra of compound **10b**

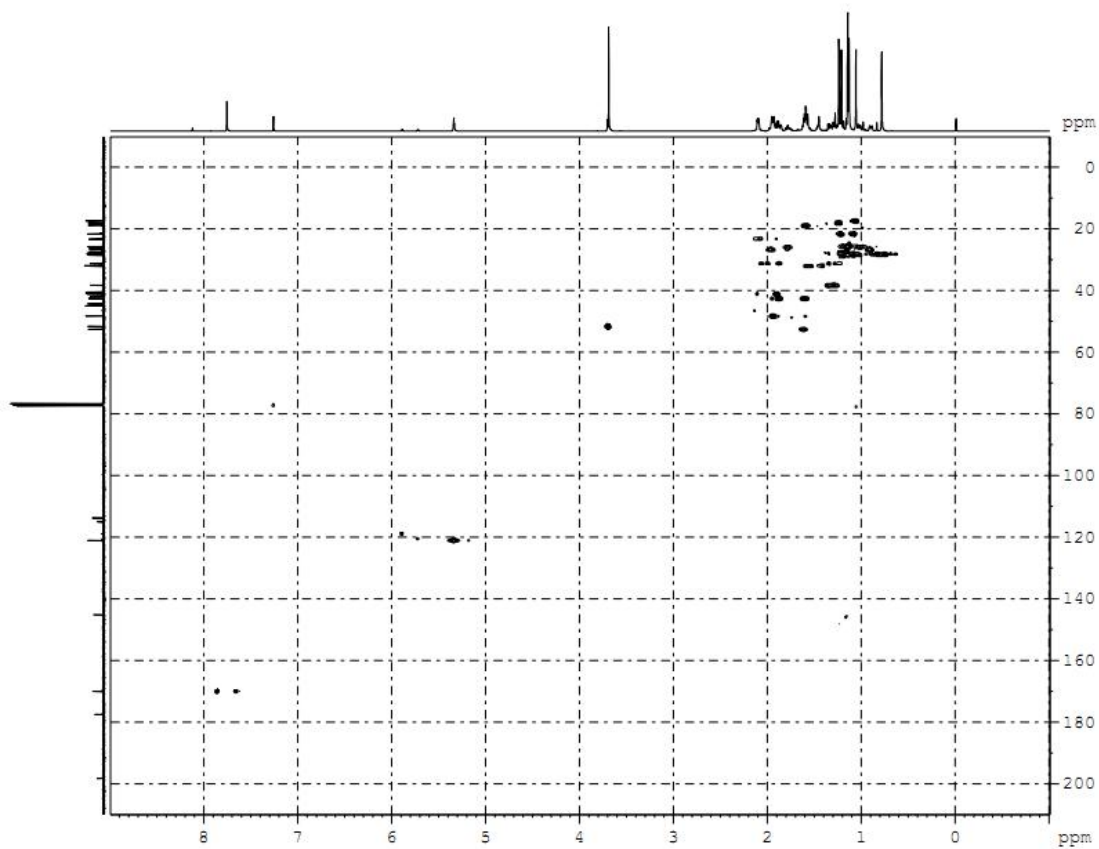

HSQC spectra of compound **10b**

Compound 10c

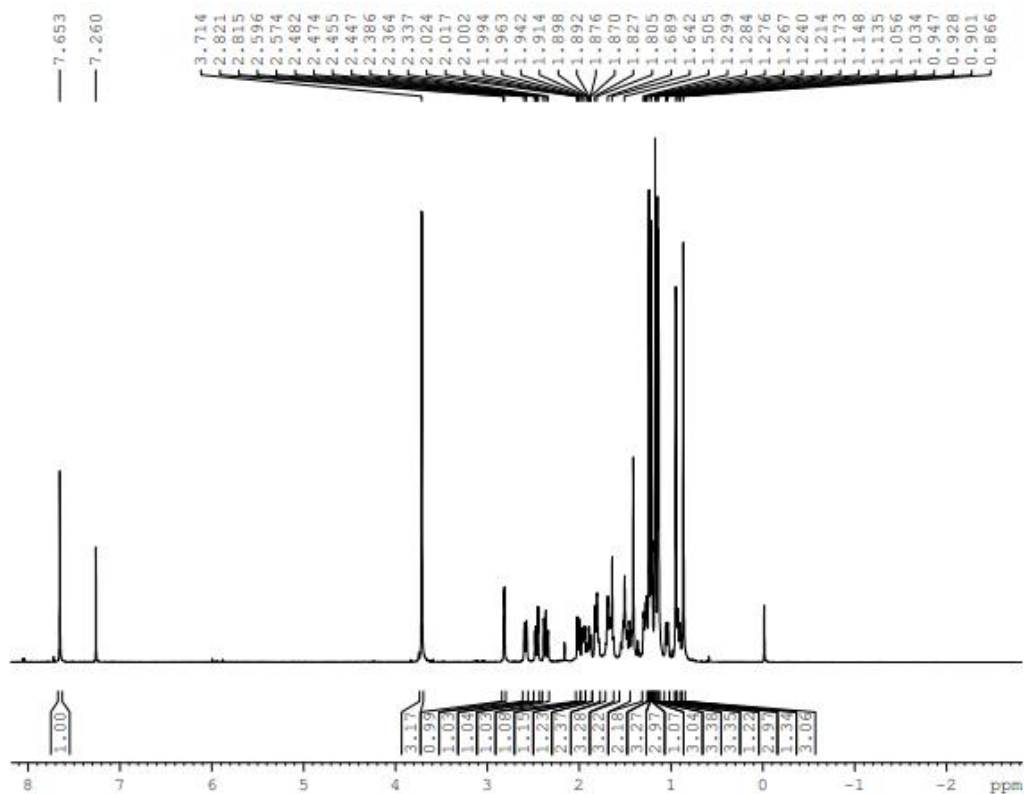

<sup>1</sup>H NMR spectra of compound 10c

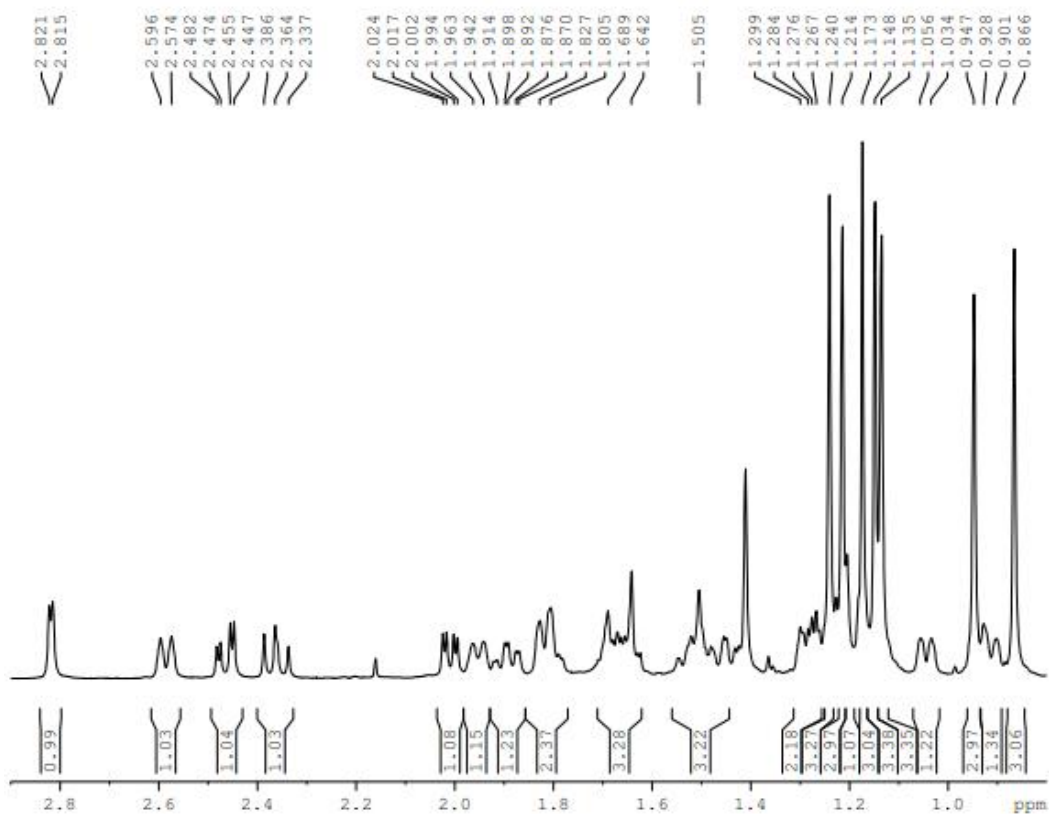

<sup>1</sup>H NMR spectra of compound 10c

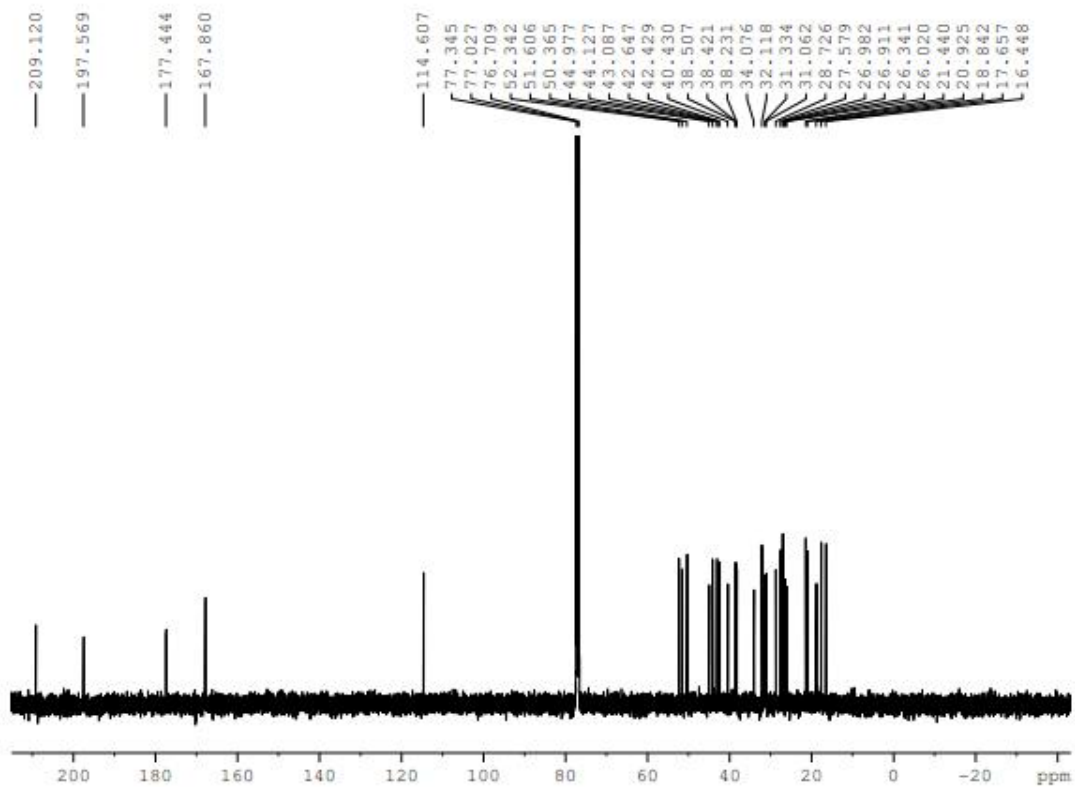

<sup>13</sup>C NMR spectra of compound 10c

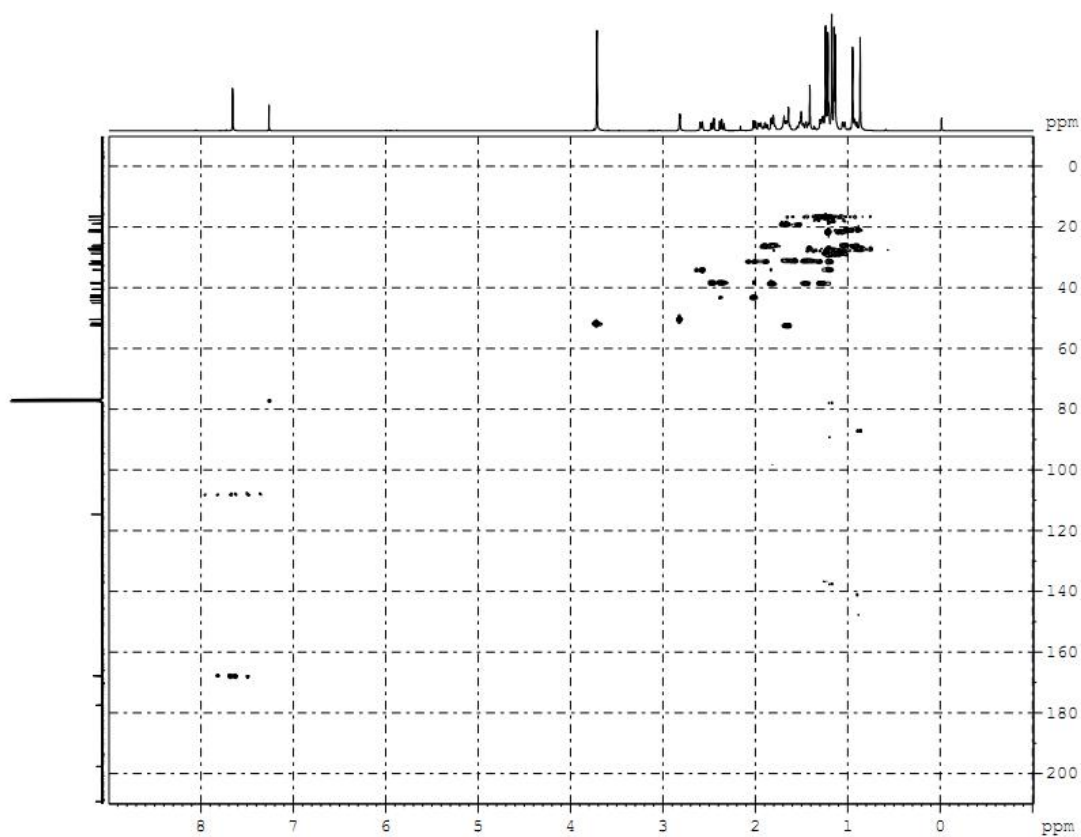

HSQC spectra of compound 10c



Compound 10d

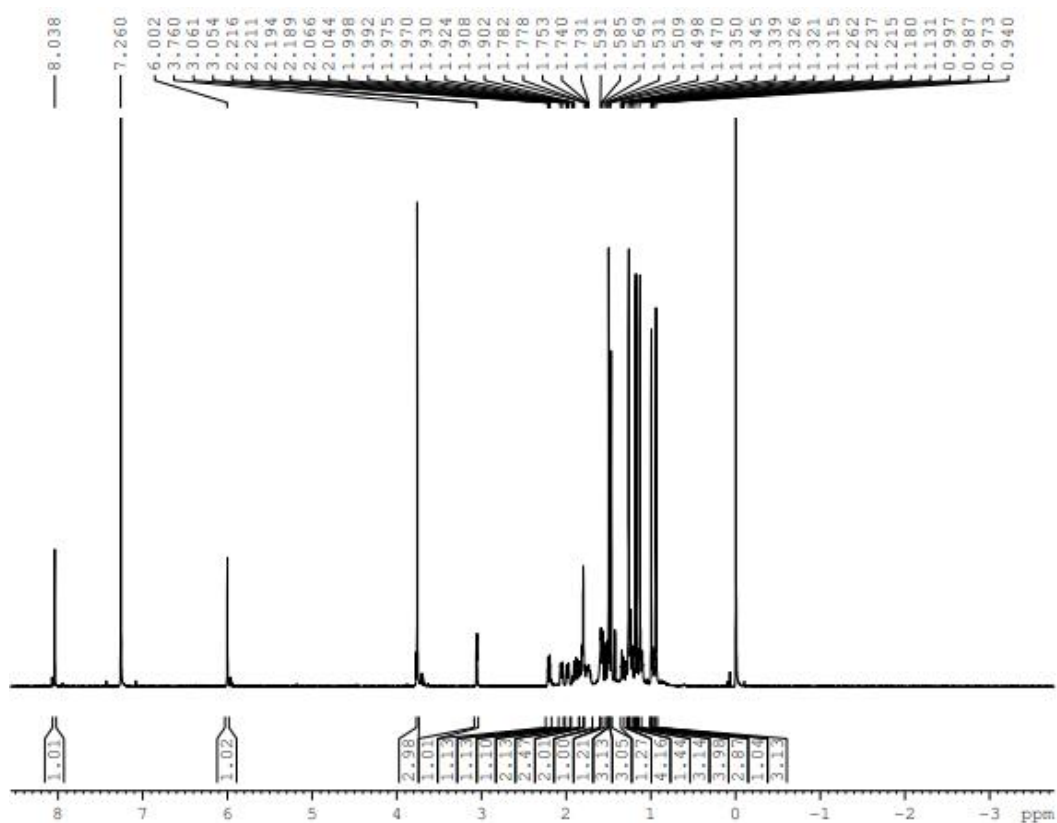

<sup>1</sup>H NMR spectra of compound 10d

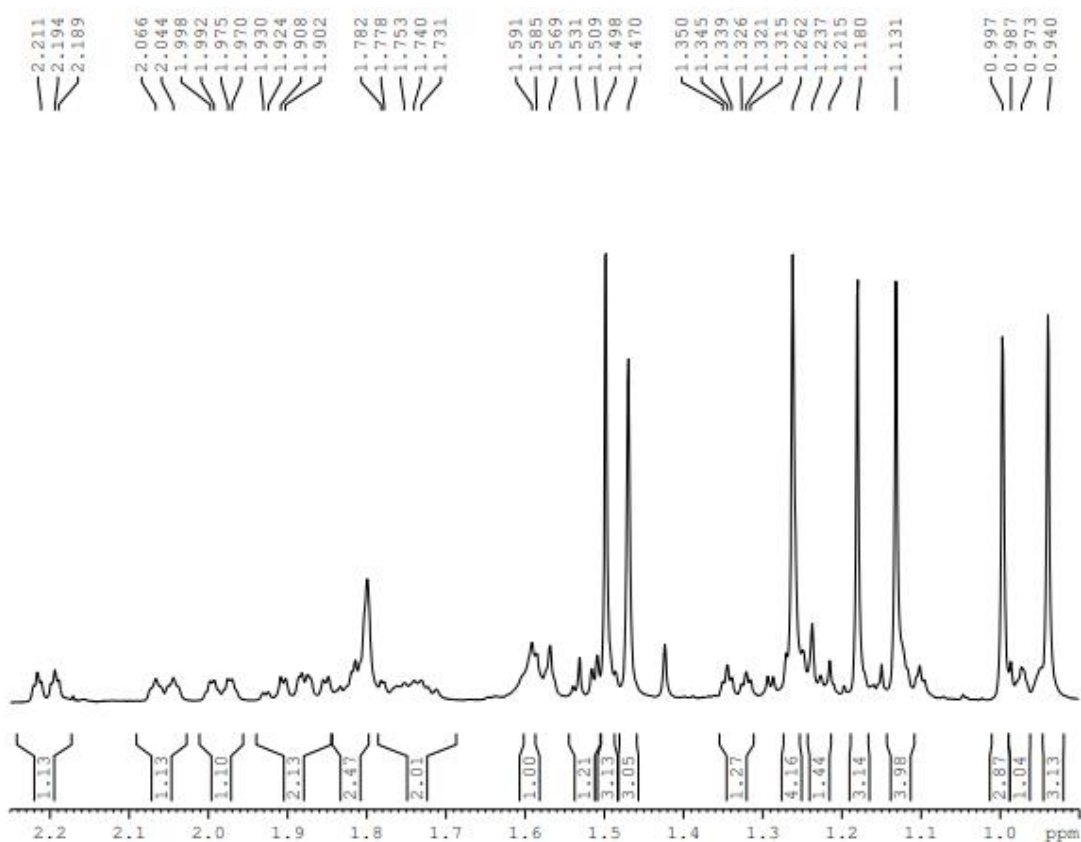

<sup>1</sup>H NMR spectra of compound 10d



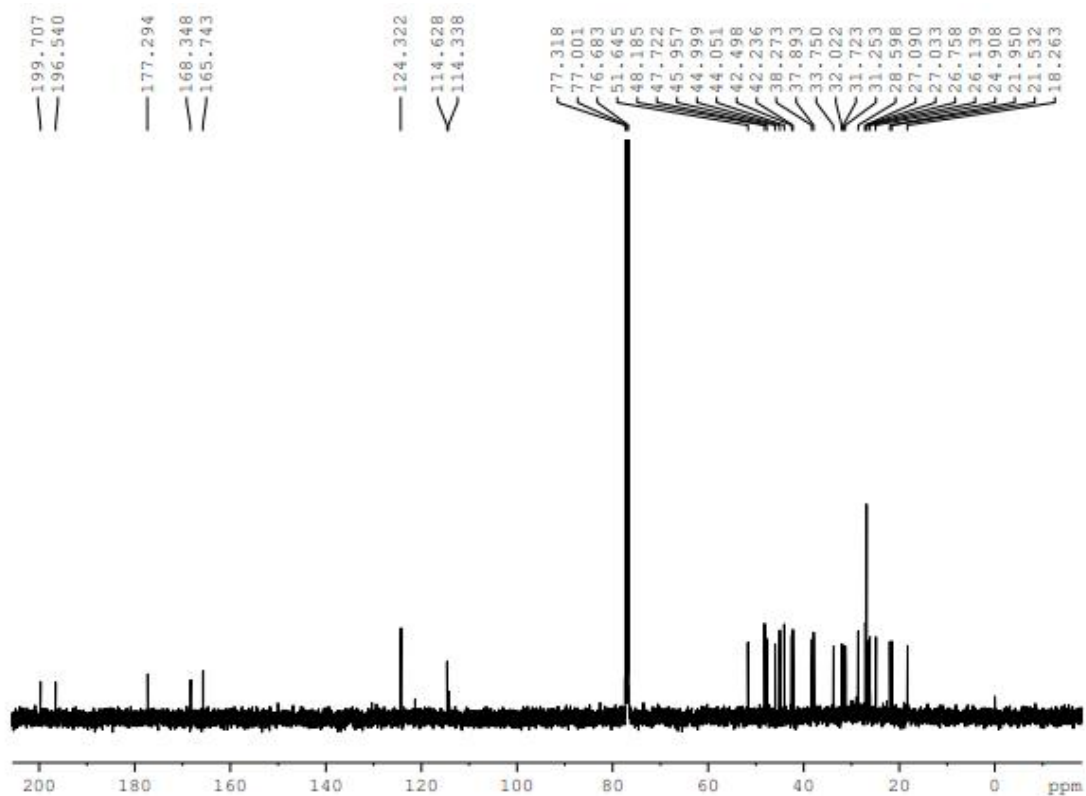

$^{13}\text{C}$  NMR spectra of compound **10d**

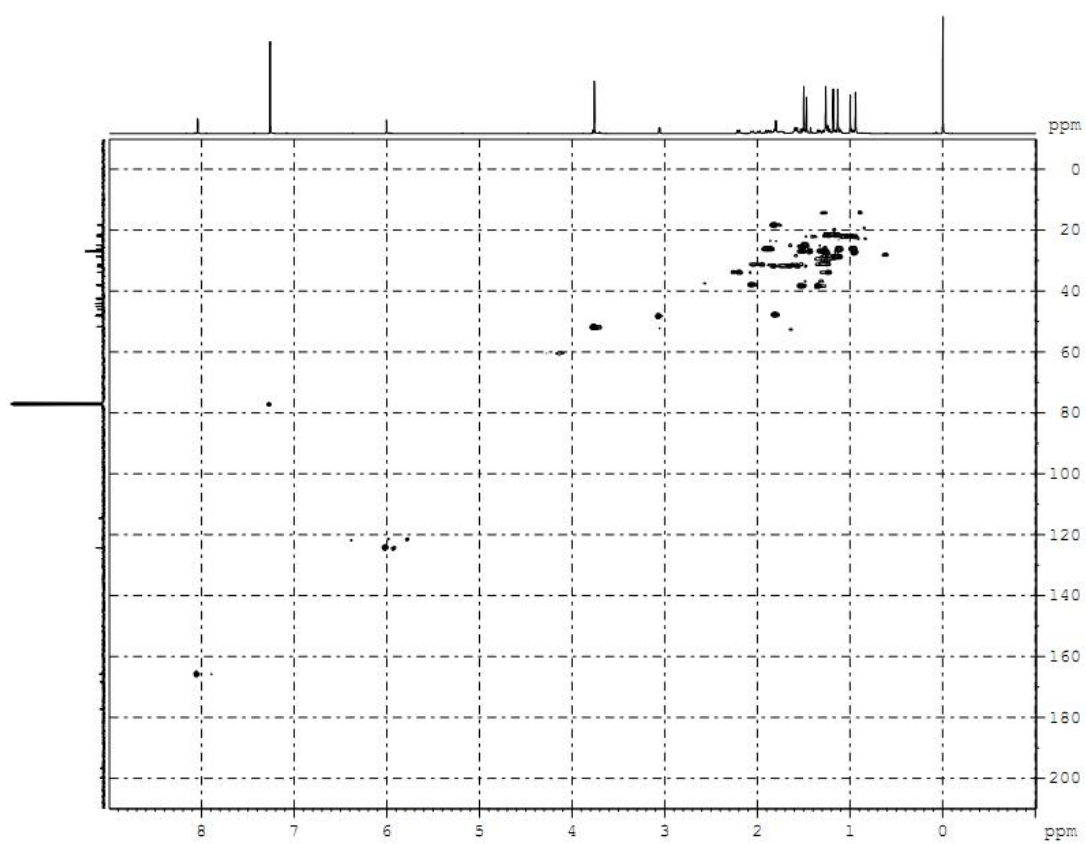

HSQC spectra of compound **10d**

Compound 10e

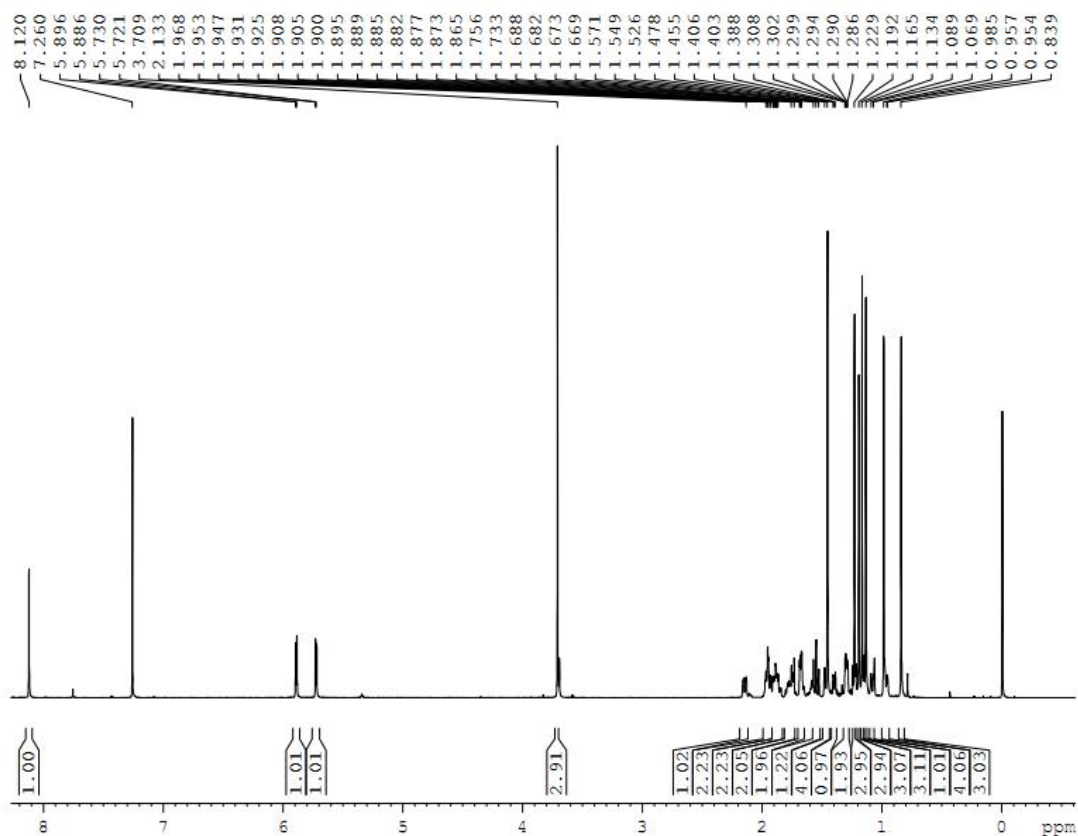

<sup>1</sup>H NMR spectra of compound 10e

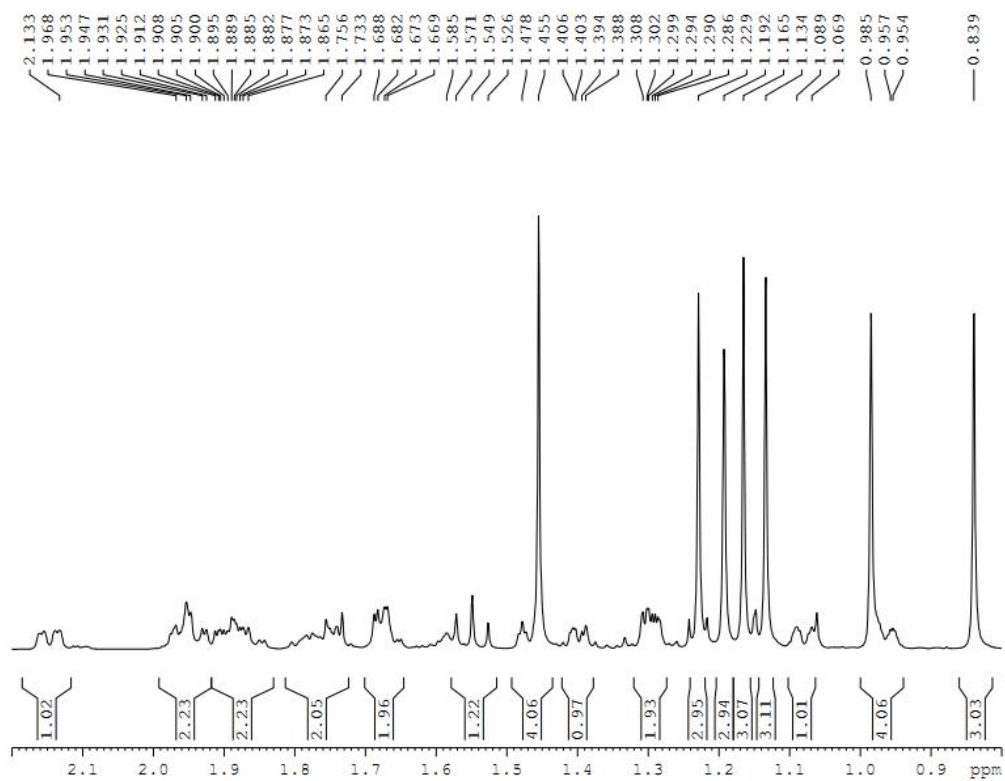

<sup>1</sup>H NMR spectra of compound 10e

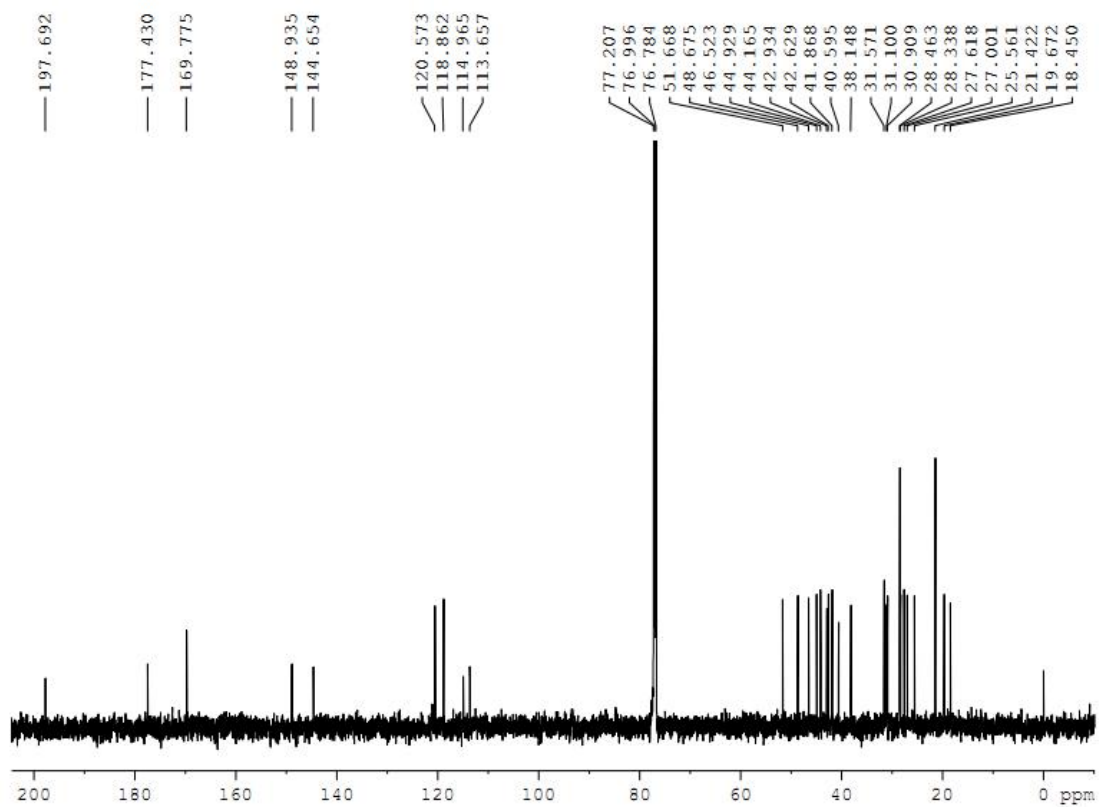

<sup>13</sup>C NMR spectra of compound 10e

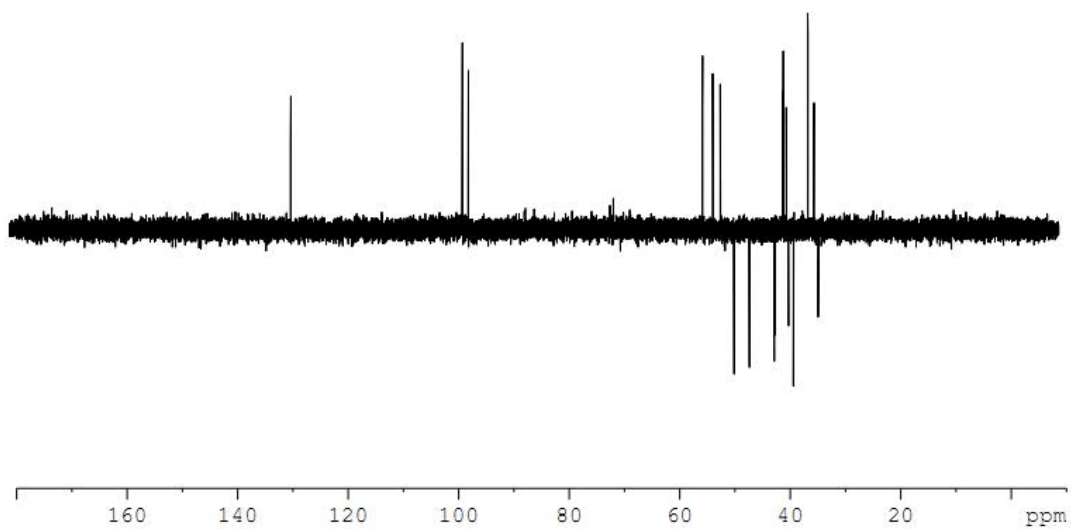

DEPT135 spectra of compound 10e

AV-600-COSY  
Sample:

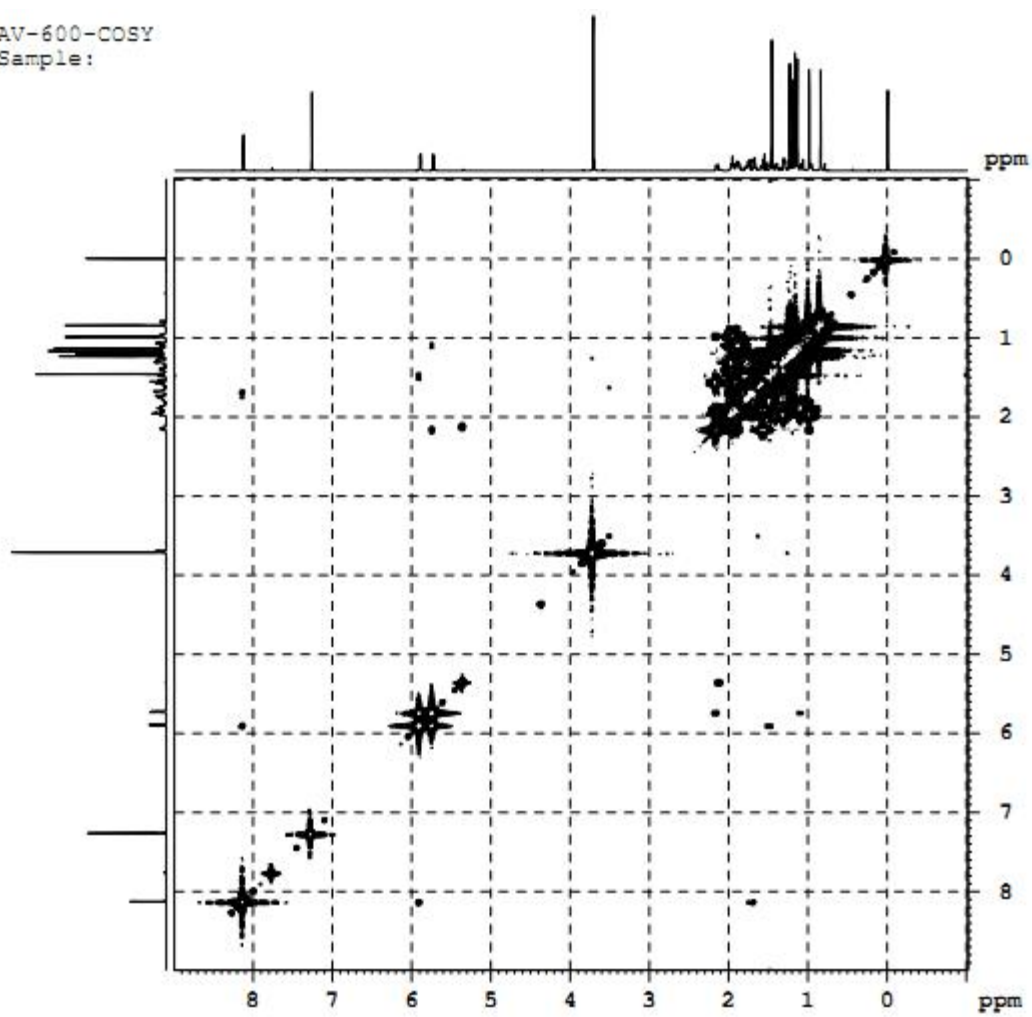

H-H COSY spectra of compound **10e**

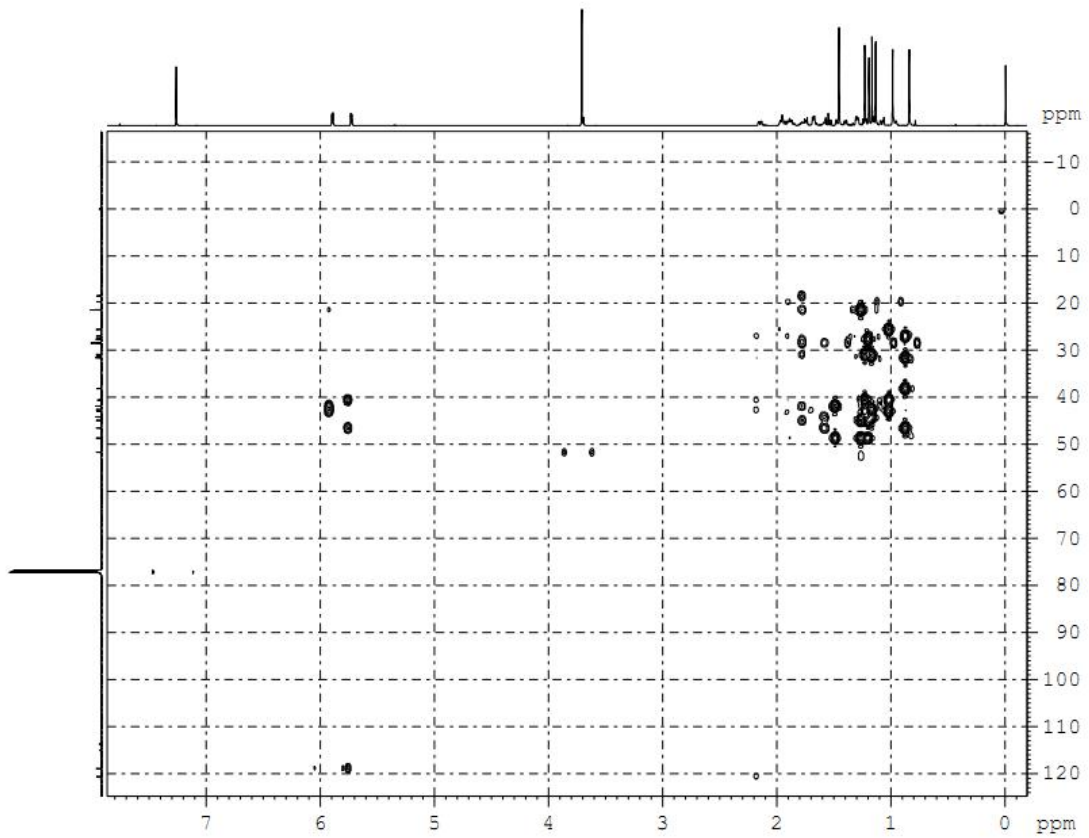

HMBC spectra of compound **10e**

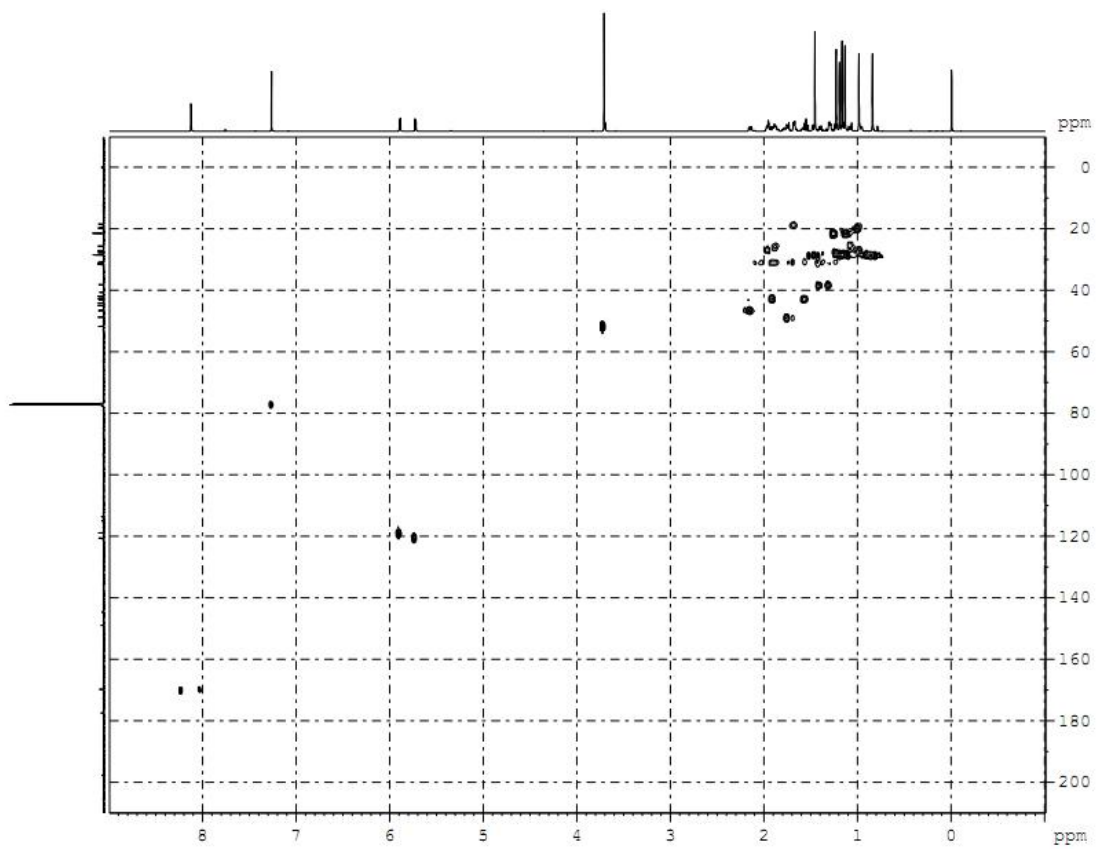

HSQC spectra of compound **10e**

Compound 11a

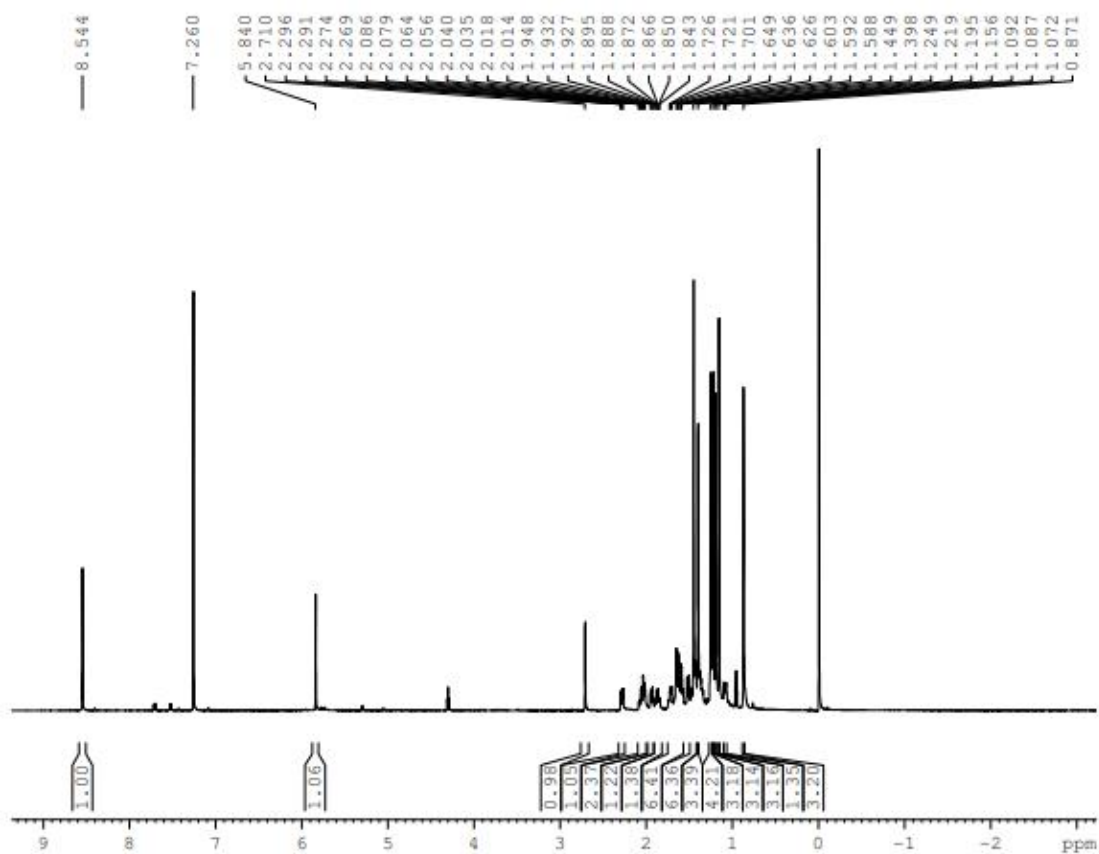

<sup>1</sup>H NMR spectra of compound 11a

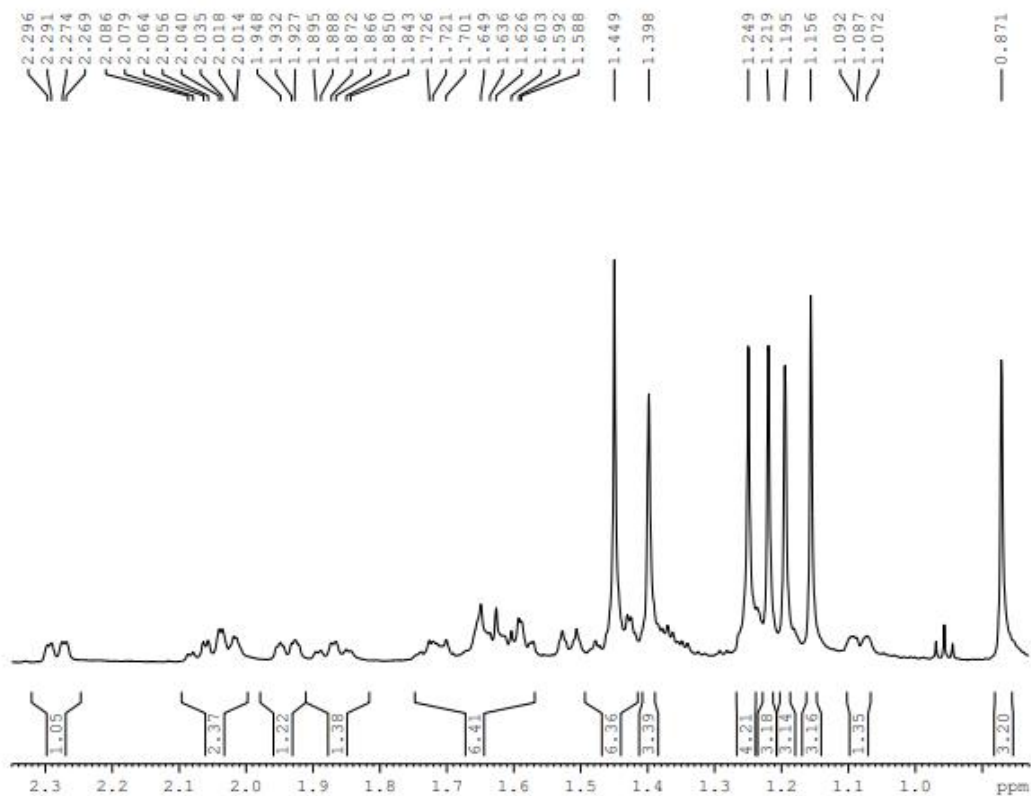

<sup>1</sup>H NMR spectra of compound 11a

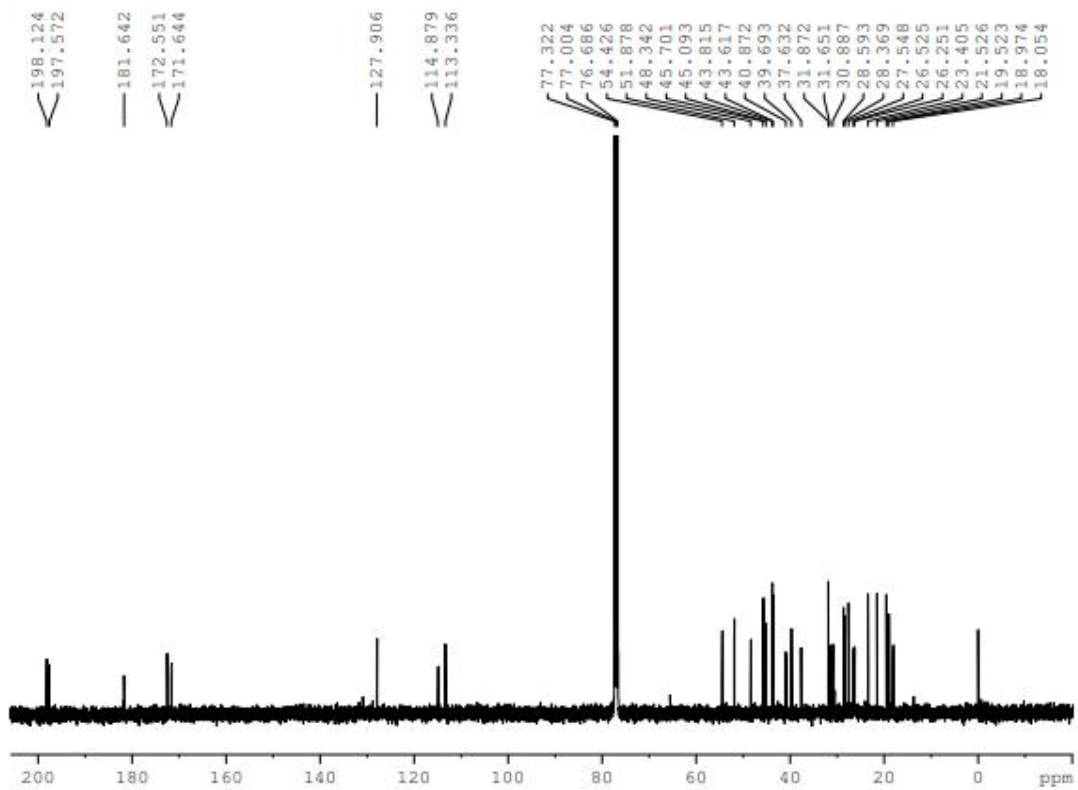

$^{13}\text{C}$  NMR spectra of compound 11a

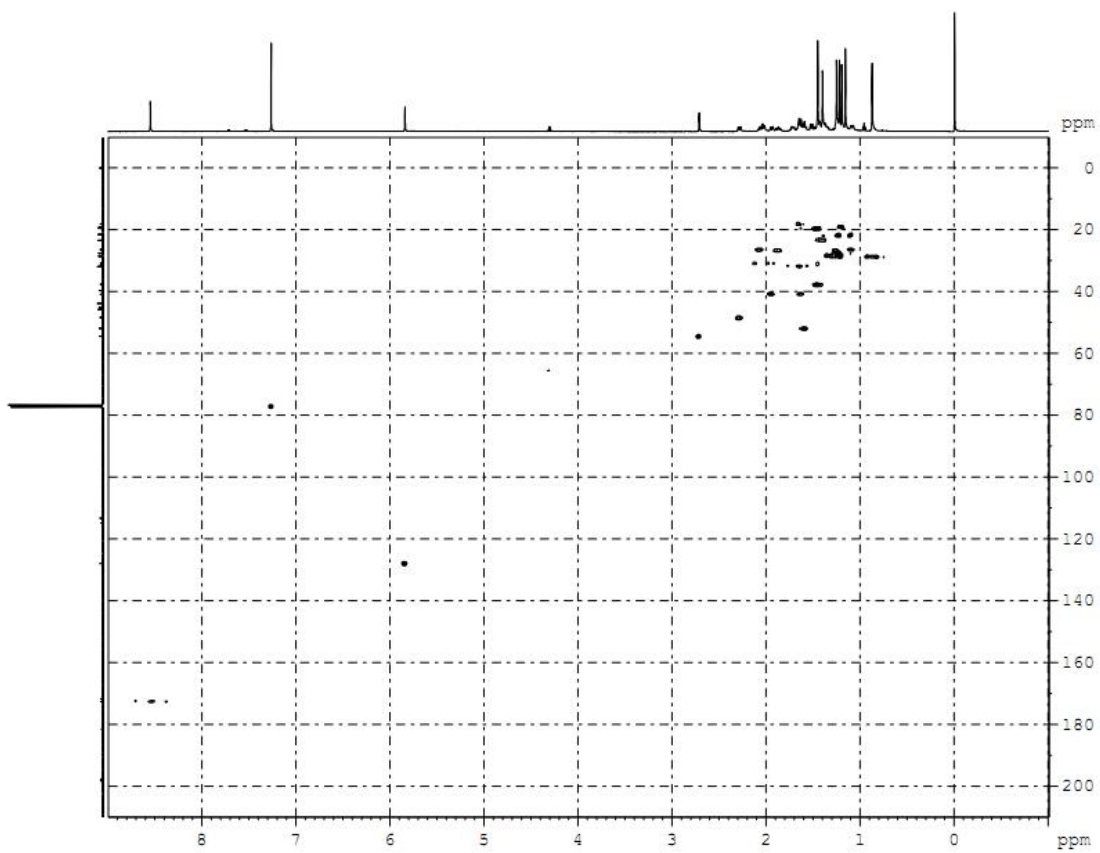

HSQC spectra of compound 11a



Compound 11c

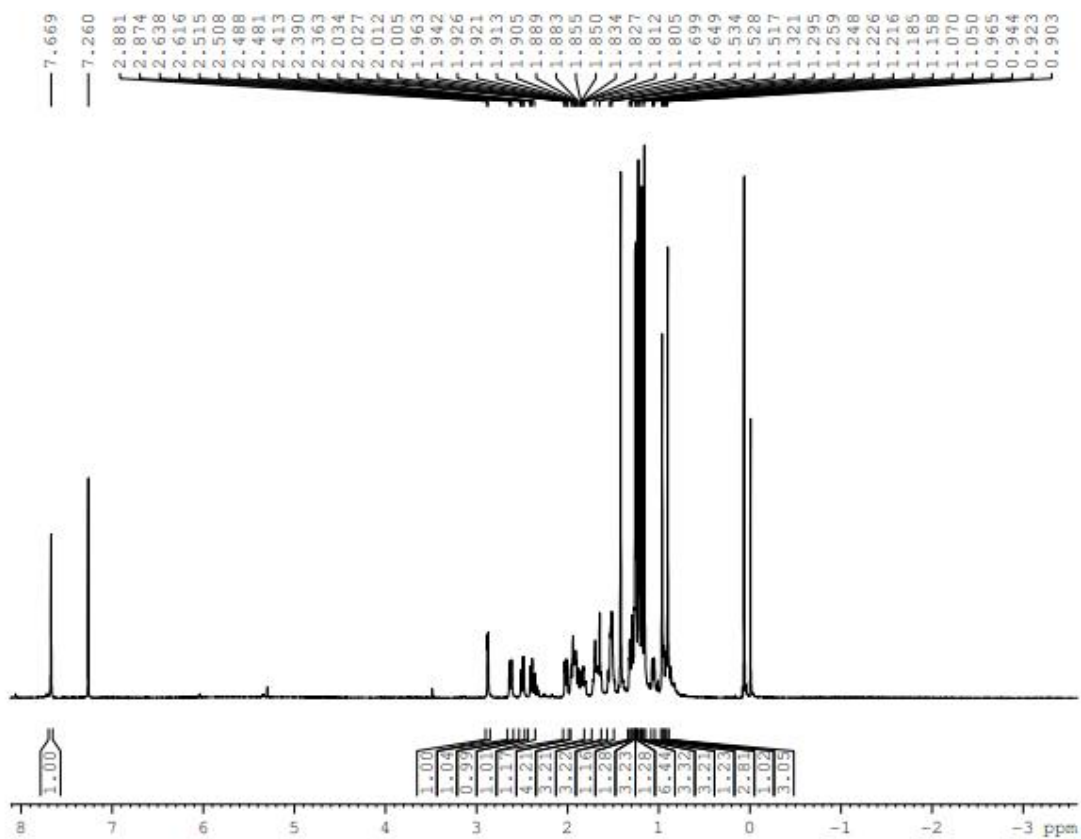

<sup>1</sup>H NMR spectra of compound 11c

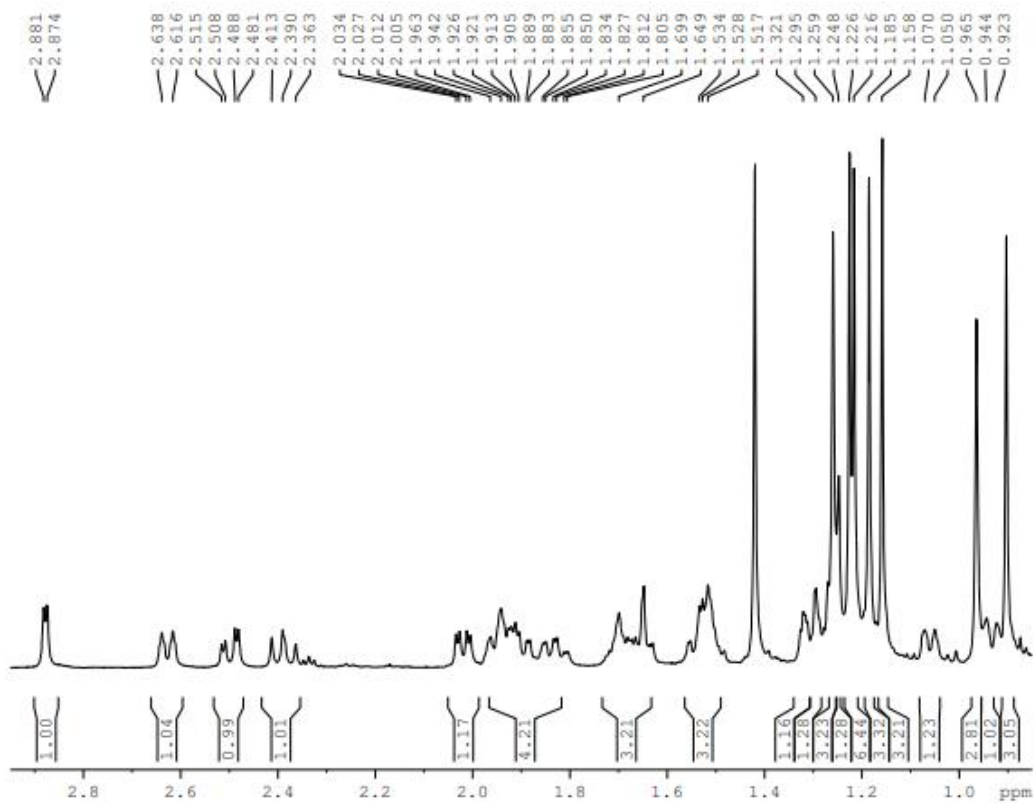

<sup>1</sup>H NMR spectra of compound 11c

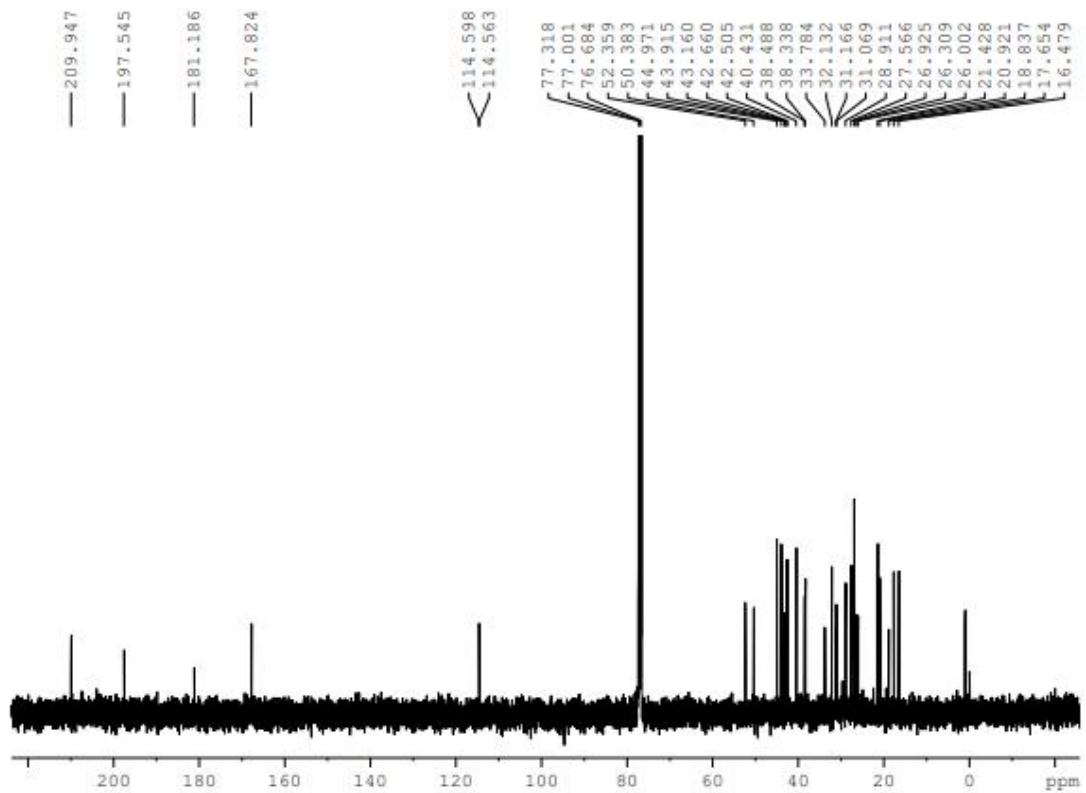

$^{13}\text{C}$  NMR spectra of compound **11c**

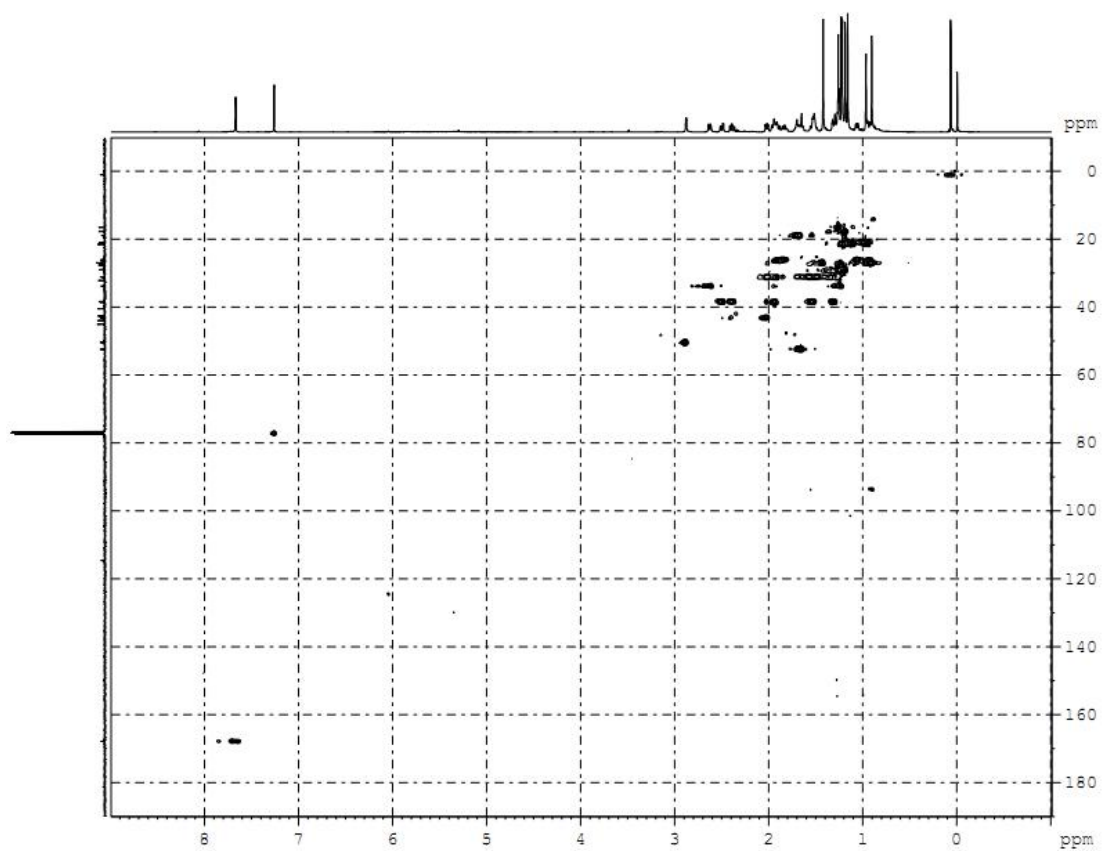

HSQC spectra of compound **11c**



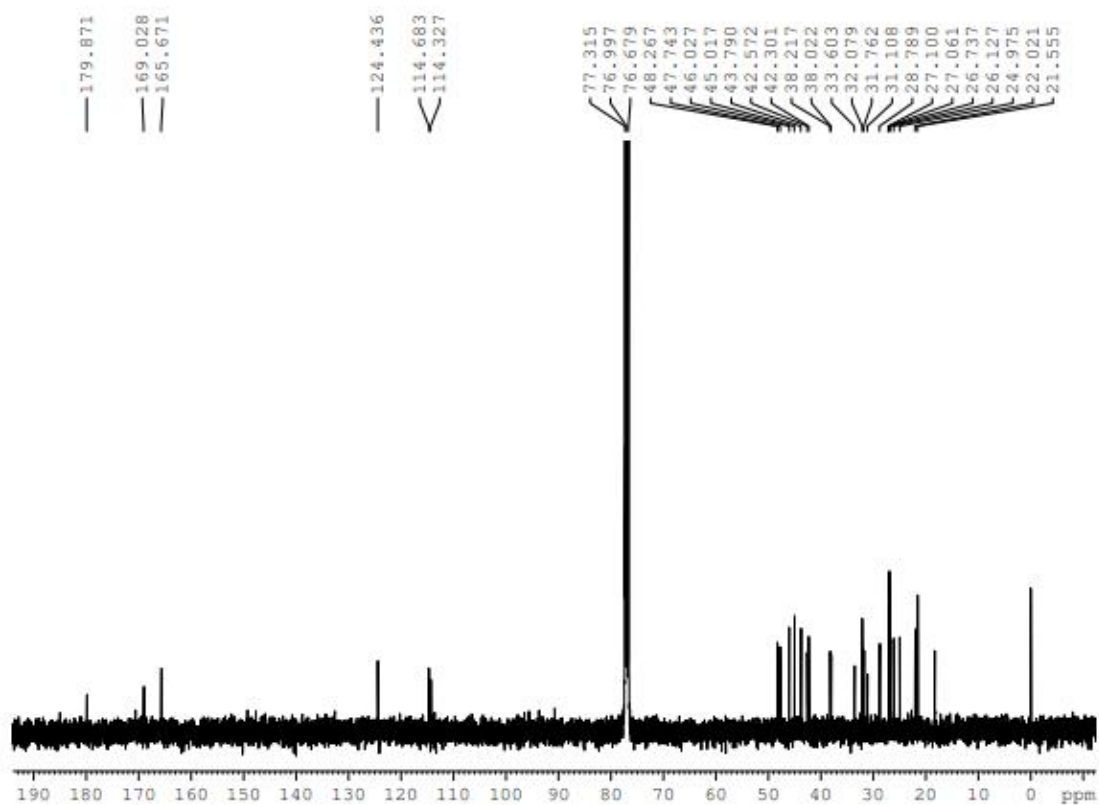

$^{13}\text{C}$  NMR spectra of compound **11d**

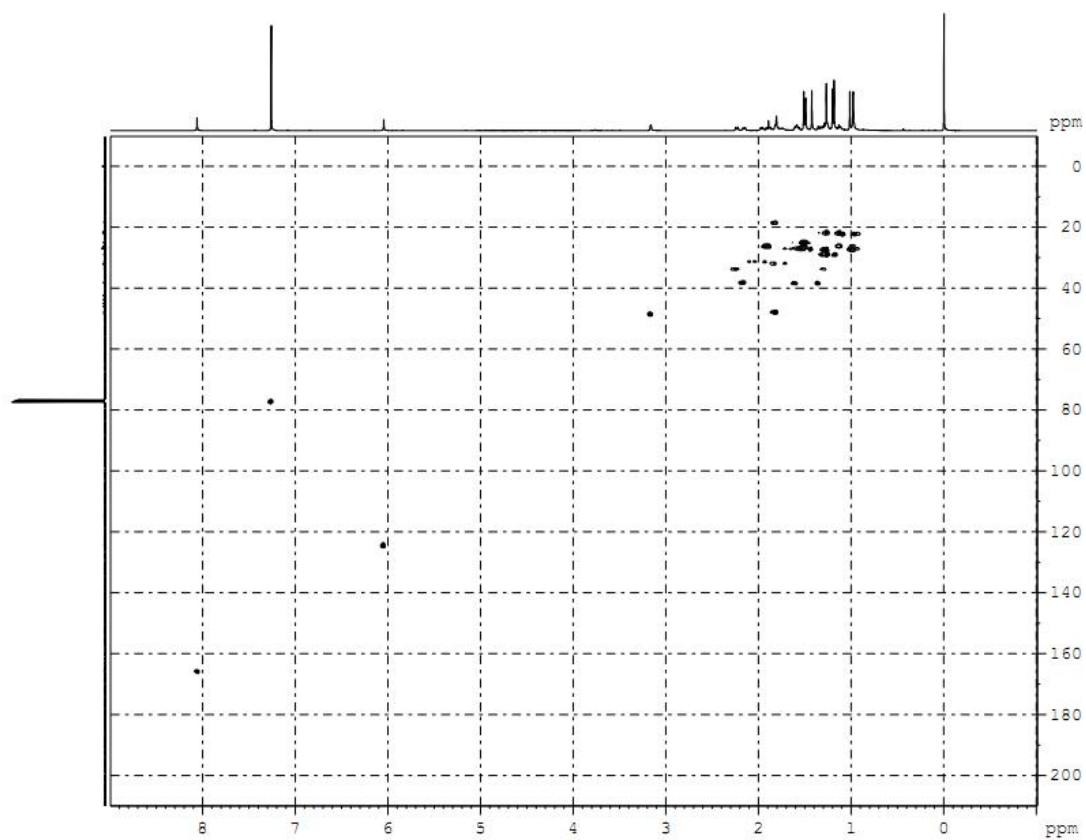

HSQC spectra of compound **11d**

Compound 12

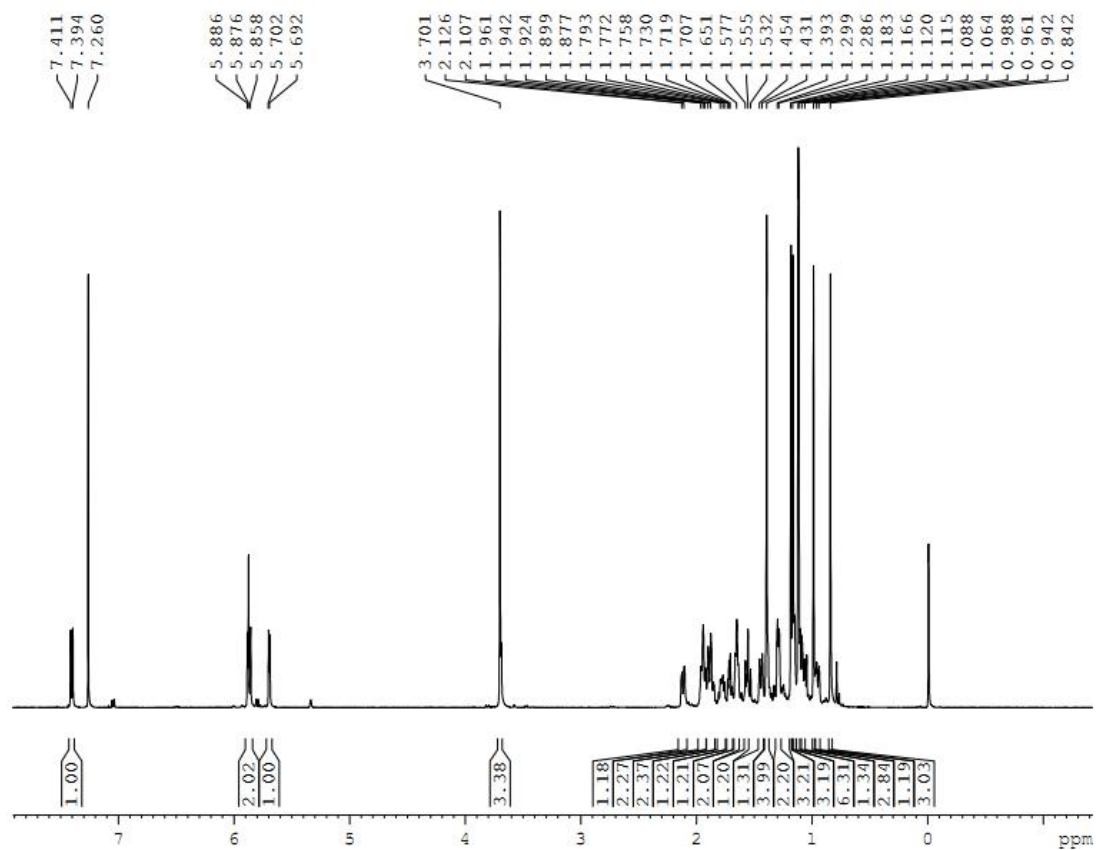

<sup>1</sup>H NMR spectra of compound 12

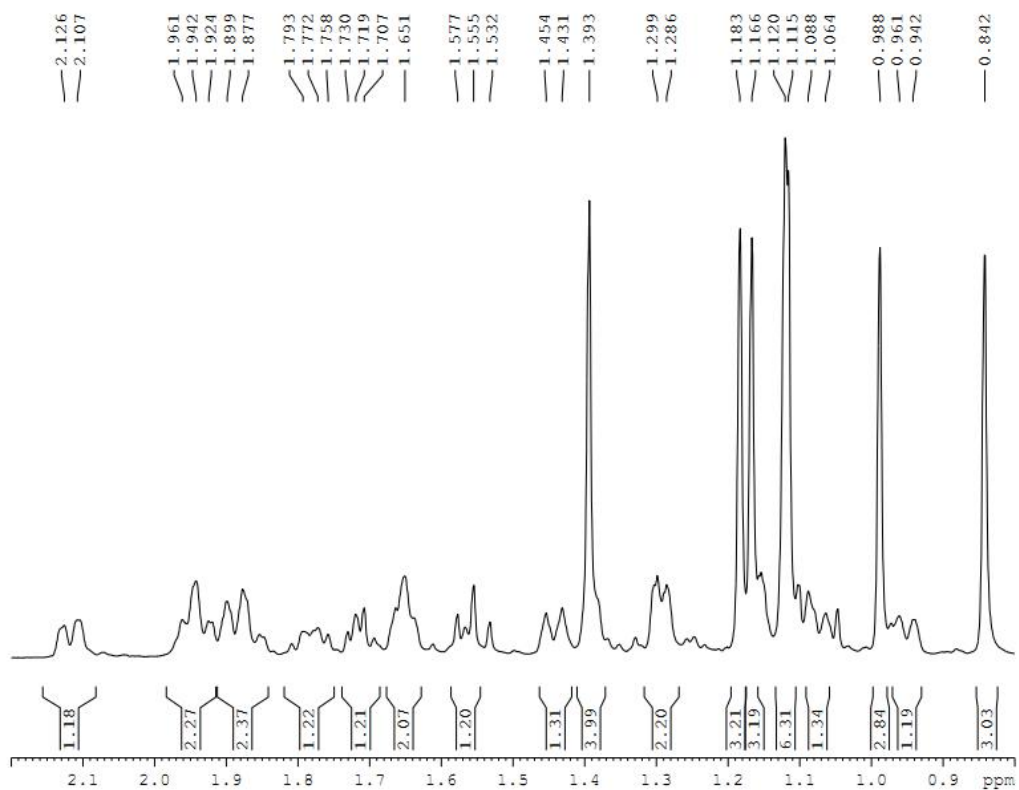

<sup>1</sup>H NMR spectra of compound 12

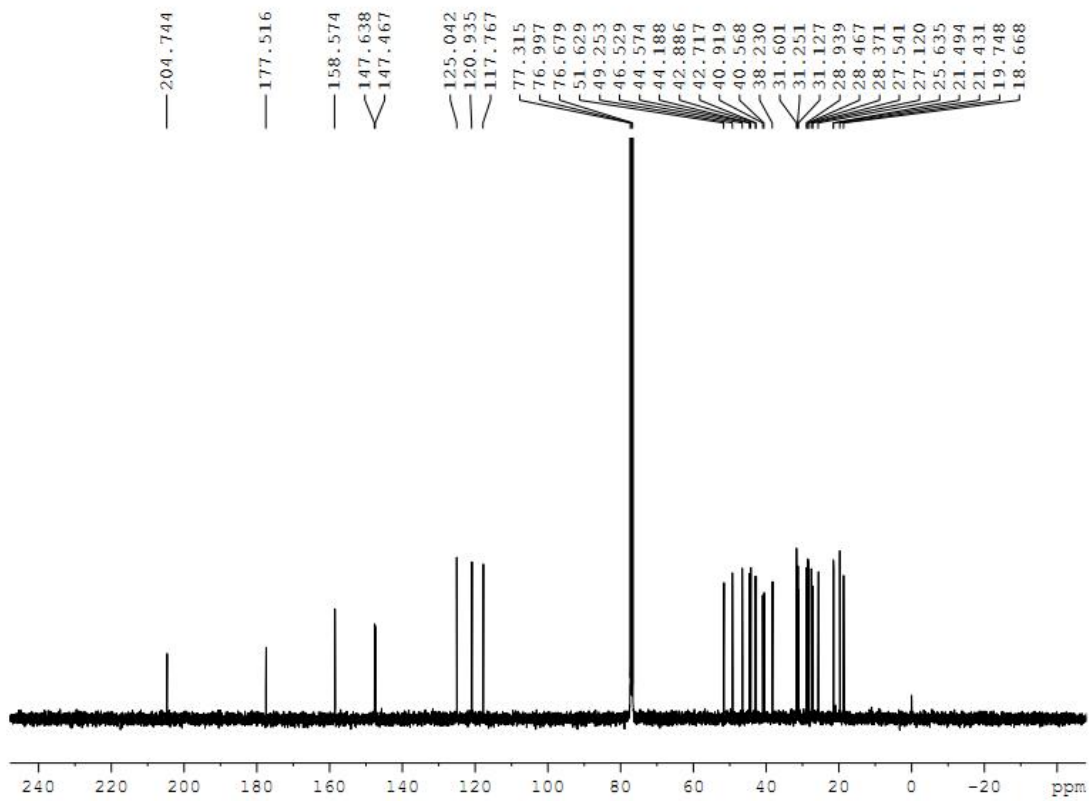

$^{13}\text{C}$  NMR spectra of compound 12

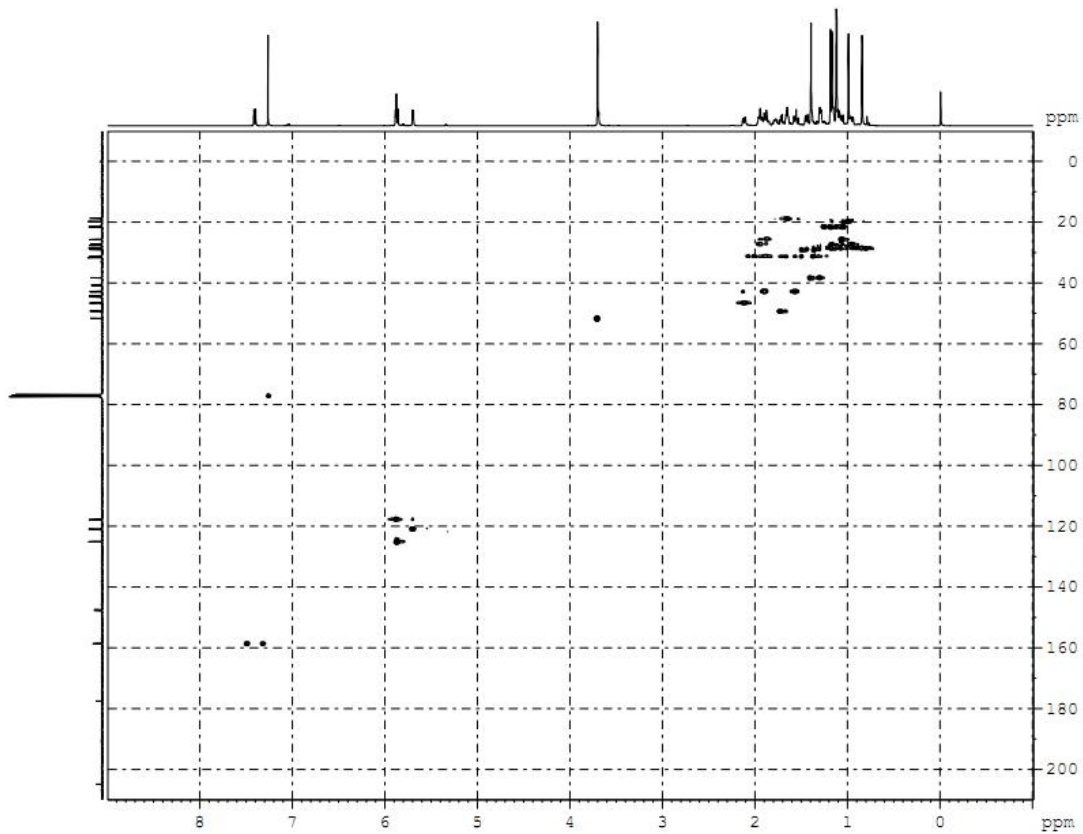

HSQC spectra of compound 12



Compound 13

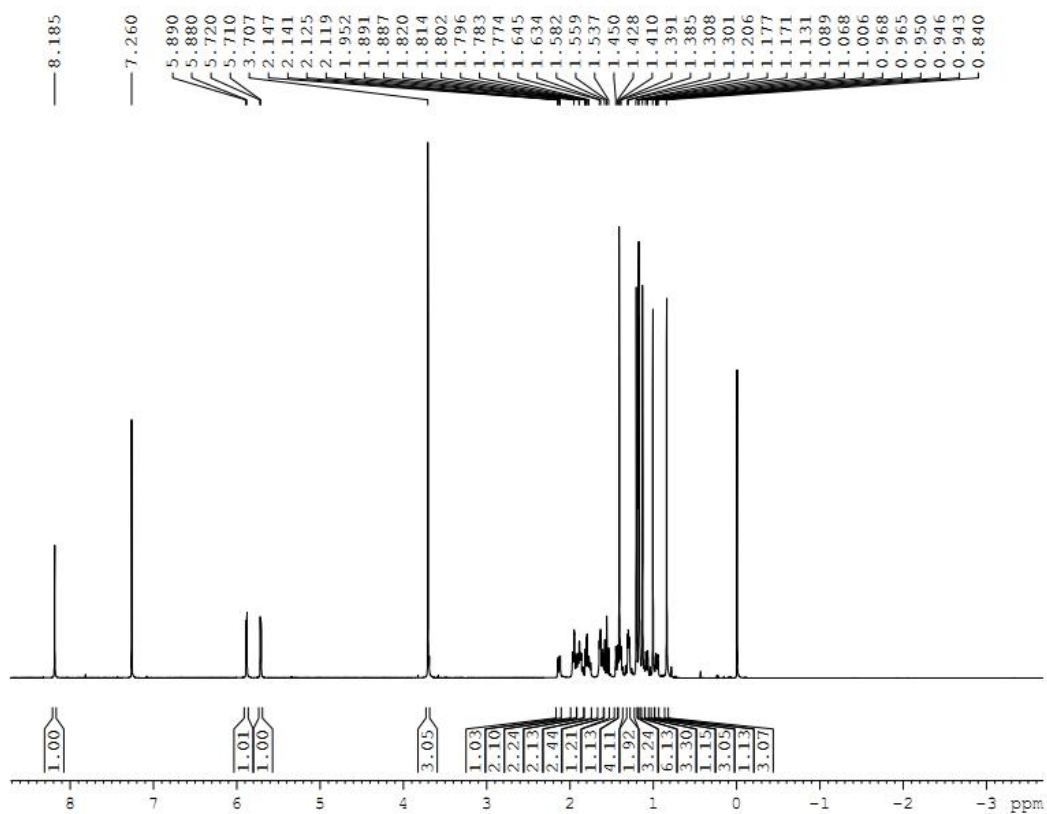

<sup>1</sup>H NMR spectra of compound 13

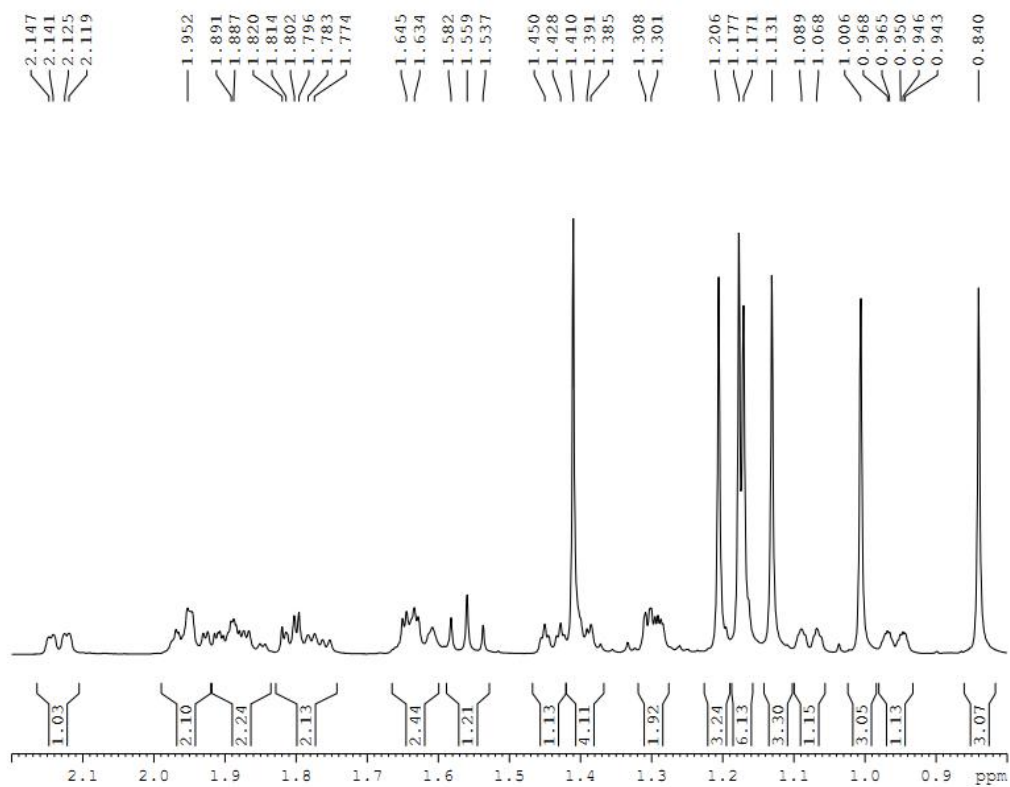

<sup>1</sup>H NMR spectra of compound 13



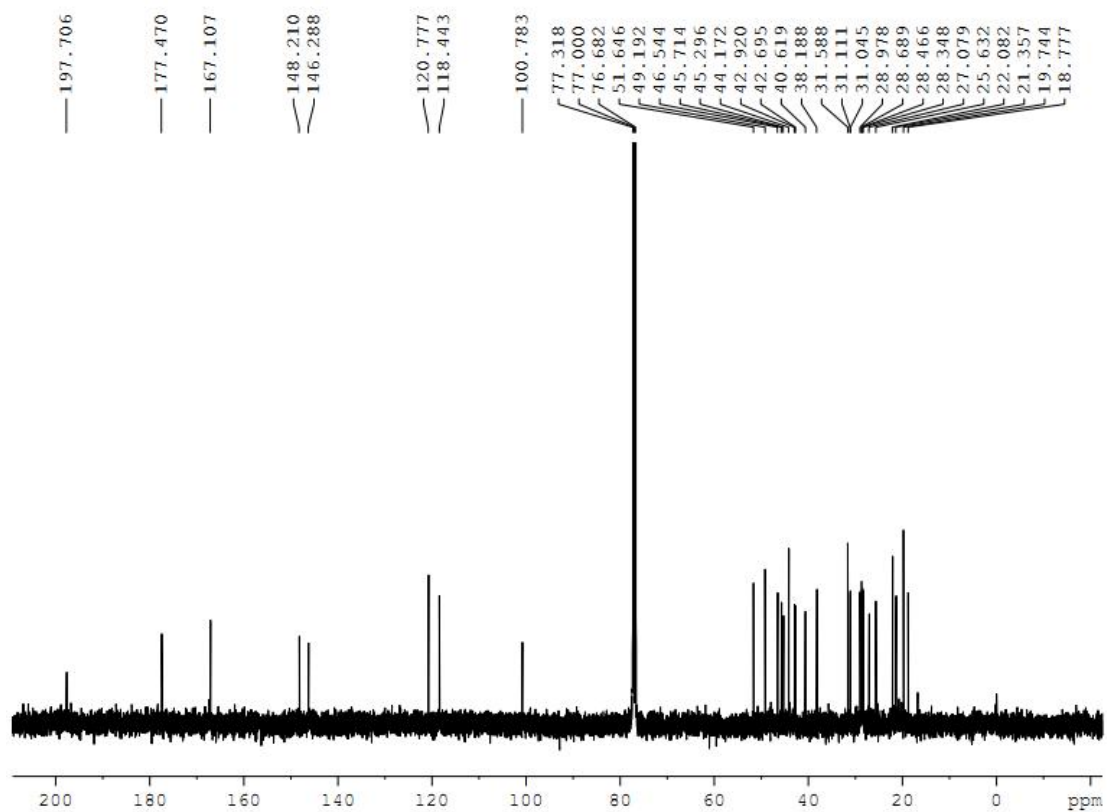

$^{13}\text{C}$  NMR spectra of compound 13

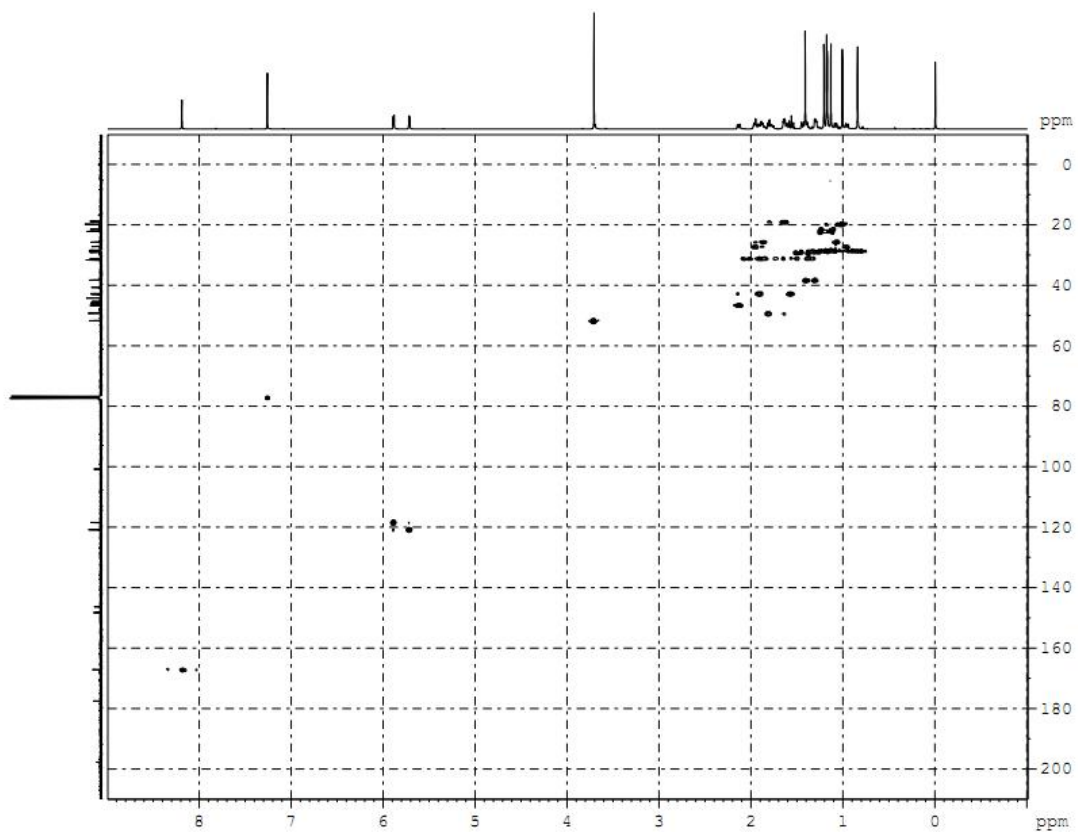

HSQC spectra of compound 13

Compound 9a

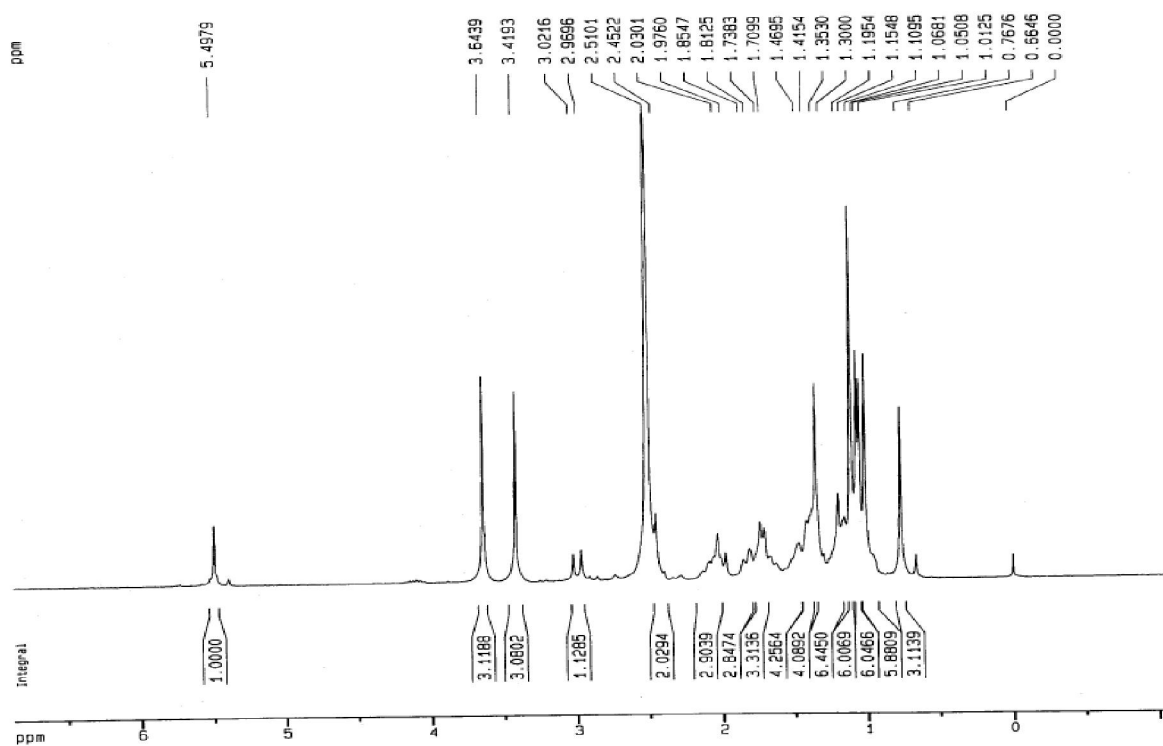

<sup>1</sup>H-NMR spectra of compound 9a

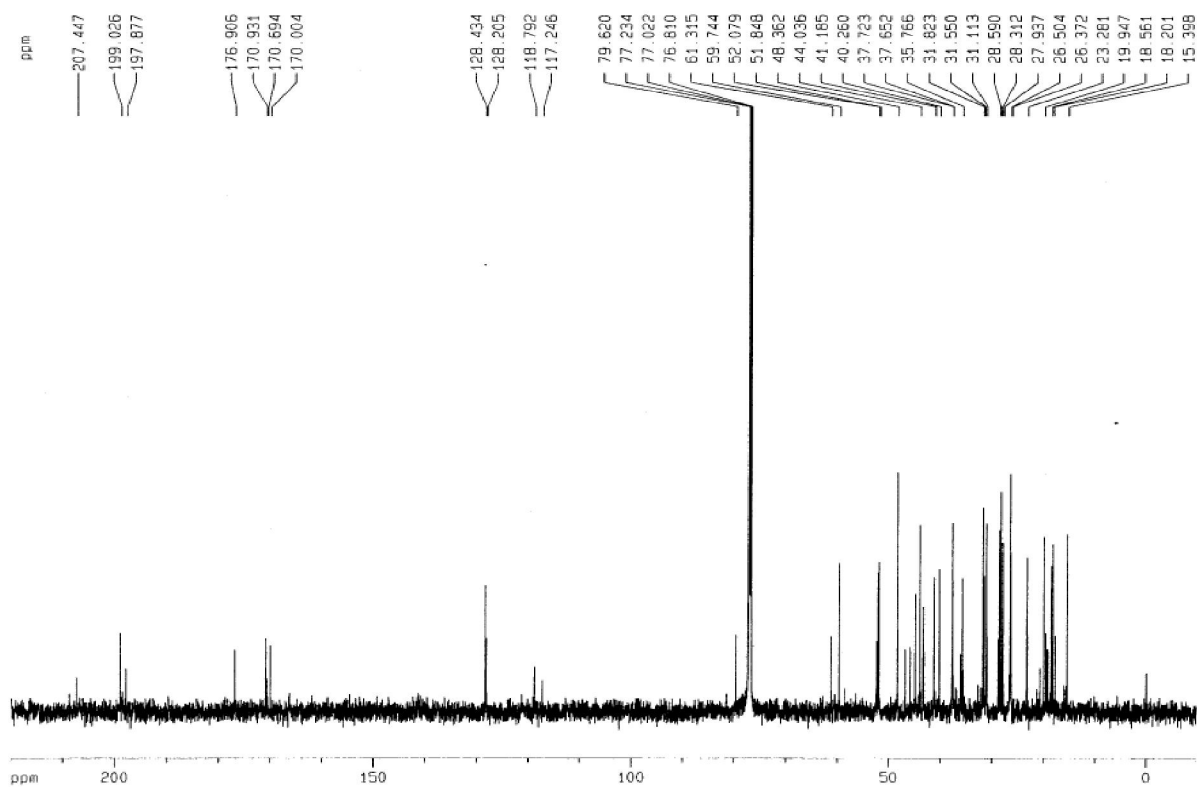

<sup>13</sup>C-NMR spectra of compound 9a

Compound 9b

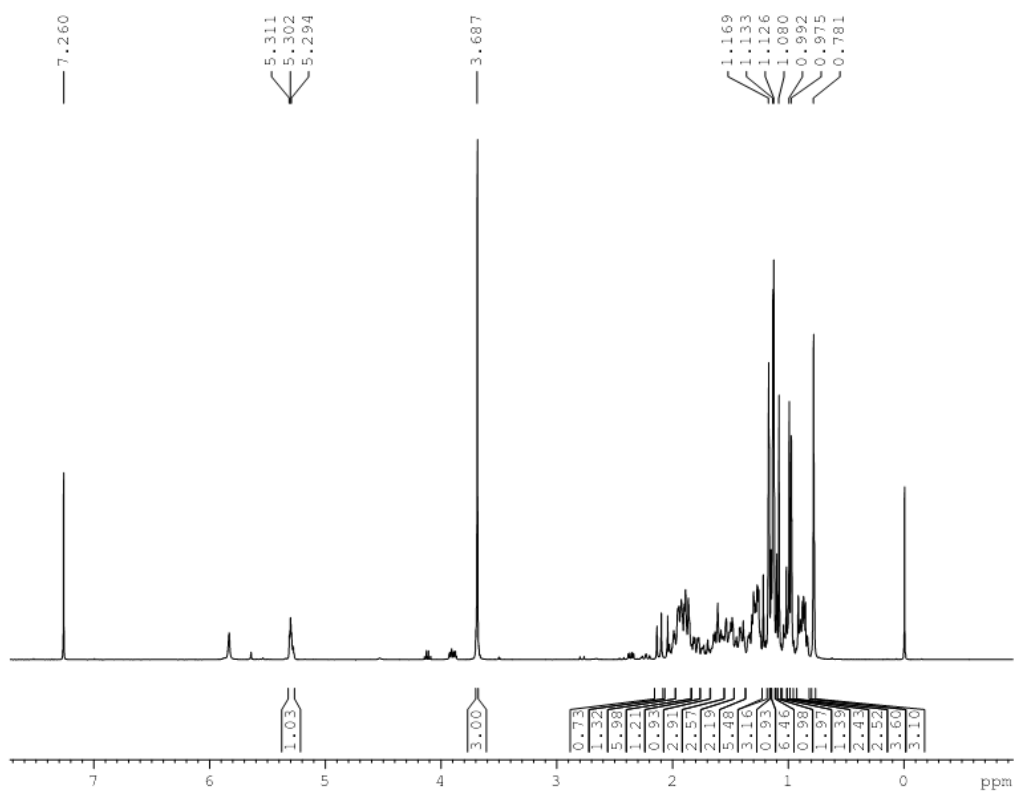

<sup>1</sup>H-NMR spectra of compound 9b

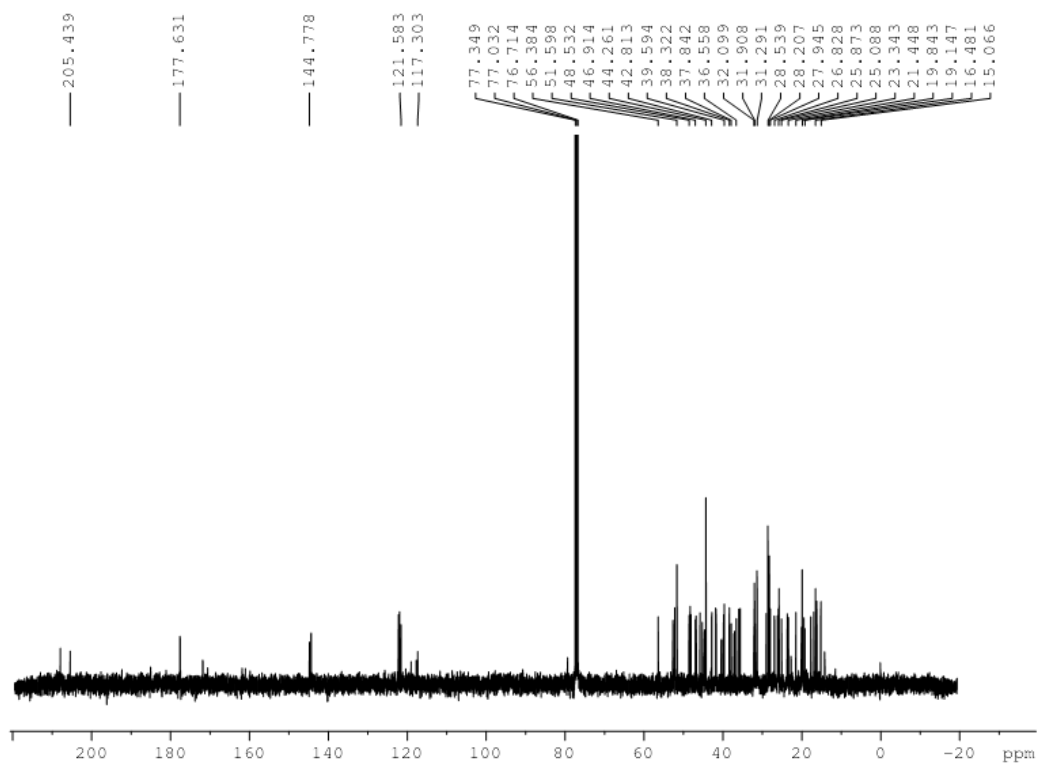

<sup>13</sup>C-NMR spectra of compound 9b

Compound 9c

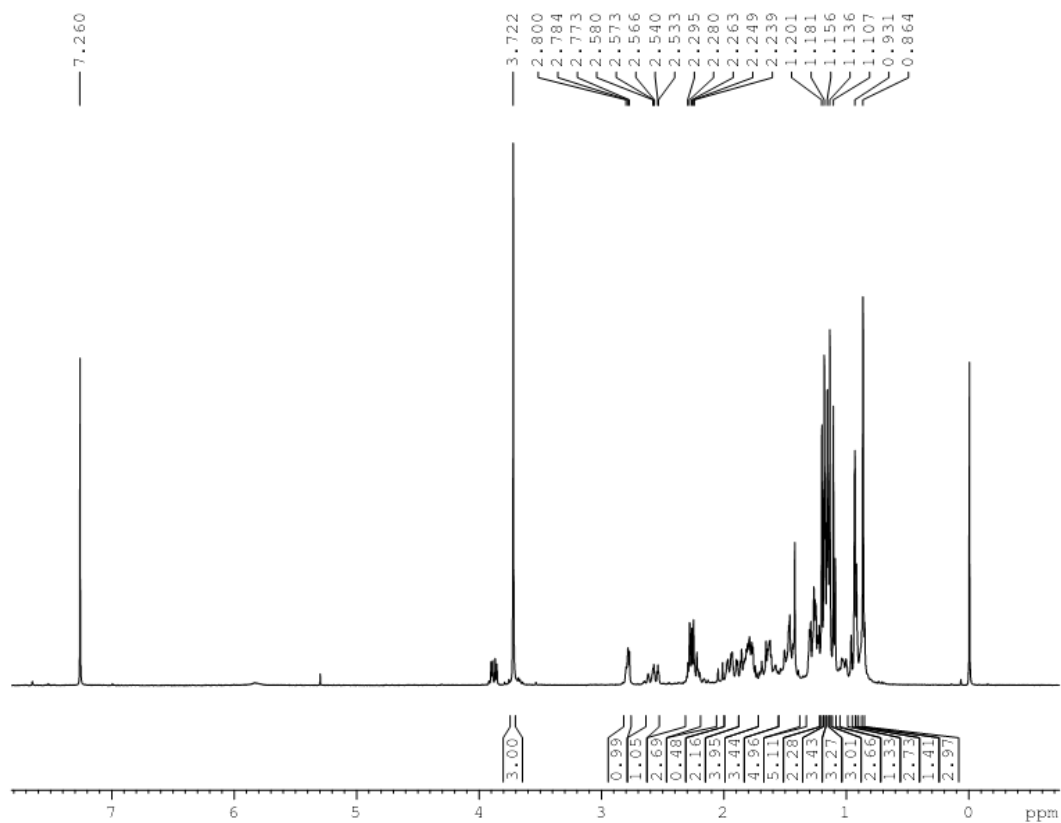

$^1\text{H-NMR}$  spectra of compound 9c

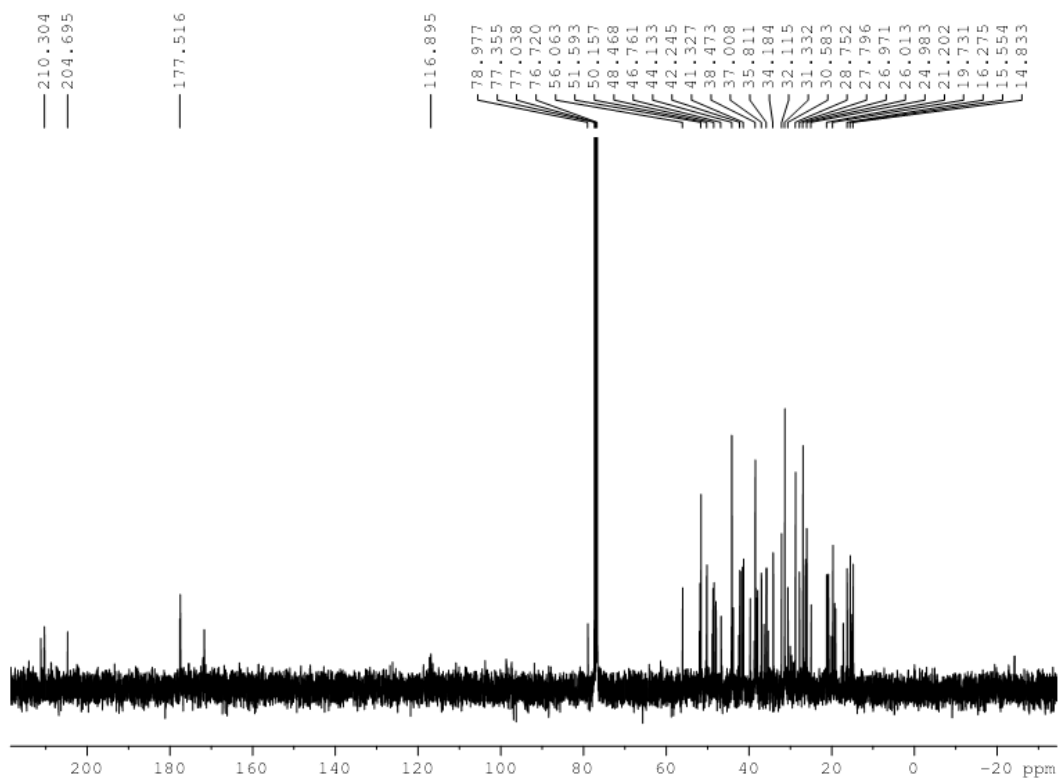

$^{13}\text{C-NMR}$  spectra of compound 9c

Compound 9d

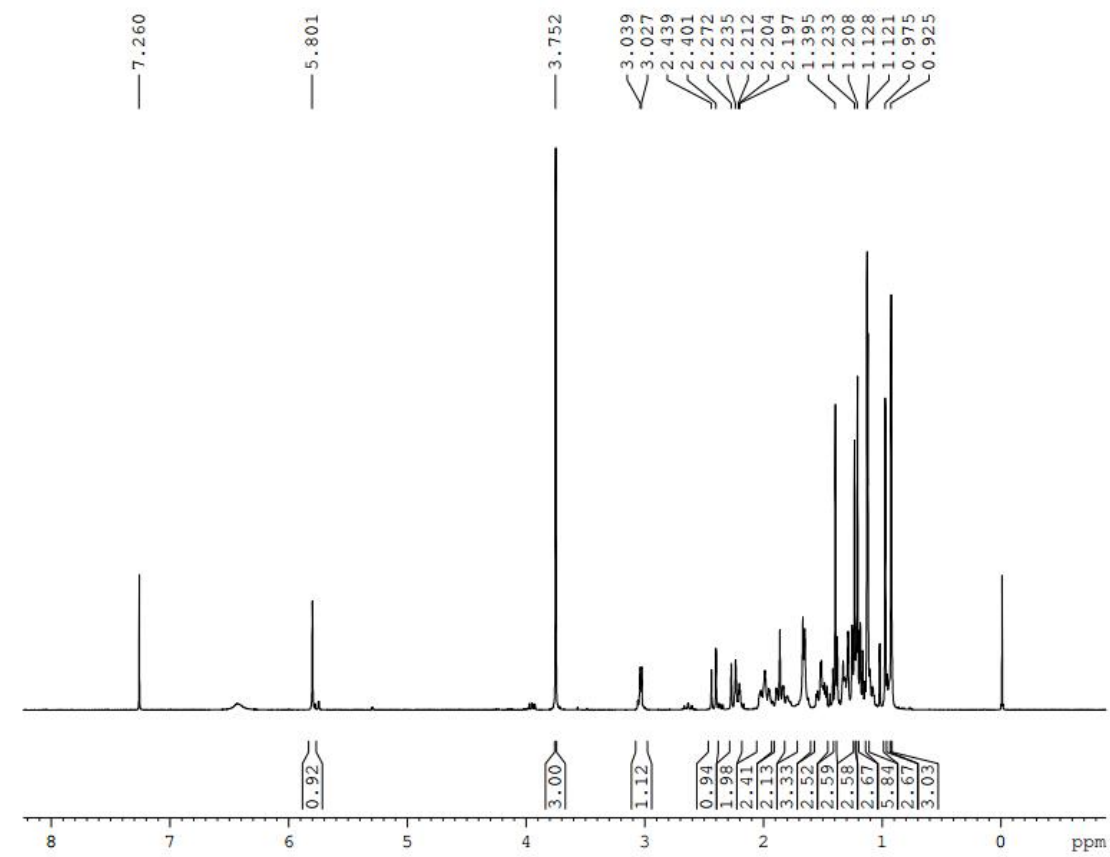

<sup>1</sup>H-NMR spectra of compound 9d

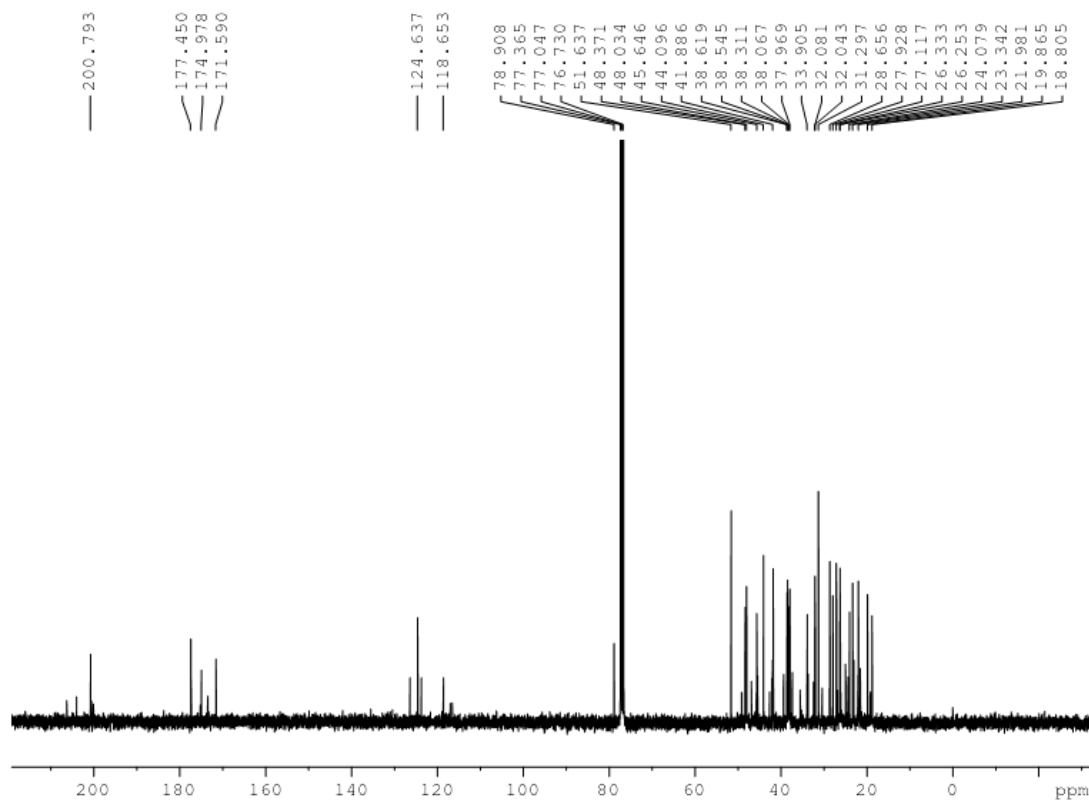

<sup>13</sup>C-NMR spectra of compound 9d

Compound 5e

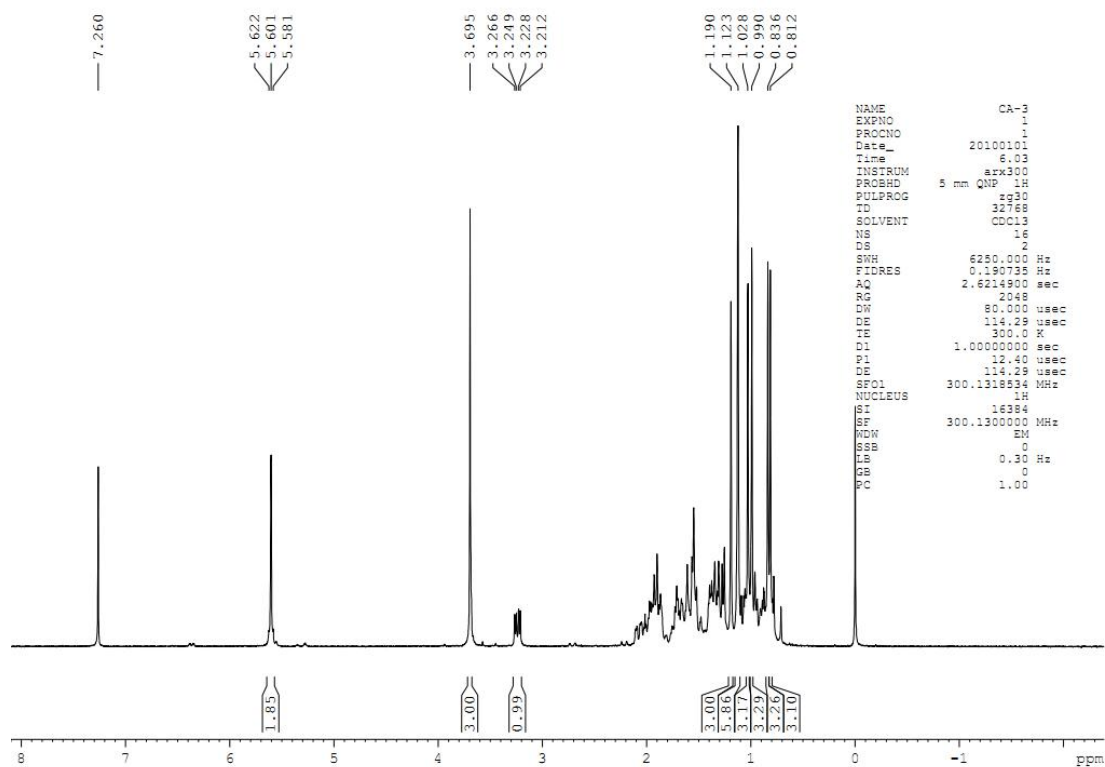

<sup>1</sup>H NMR spectra of compound 5e

Compound 7c

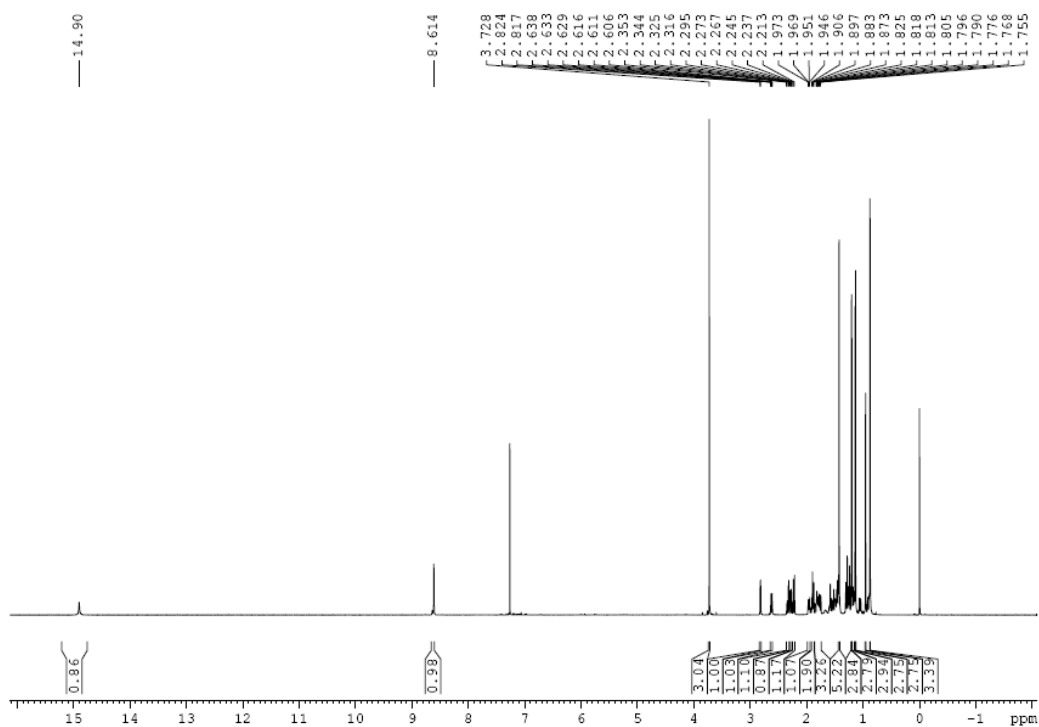

<sup>1</sup>H NMR spectra of compound 7c

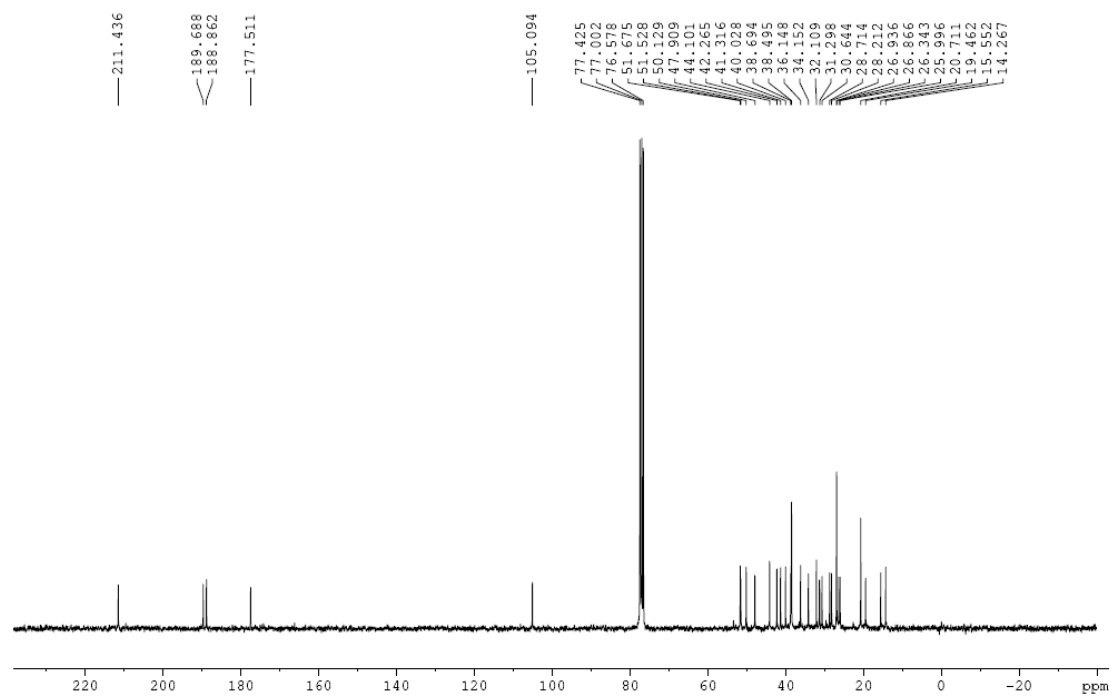

$^{13}\text{C}$  NMR spectra of compound **7c**

Compound **7e**

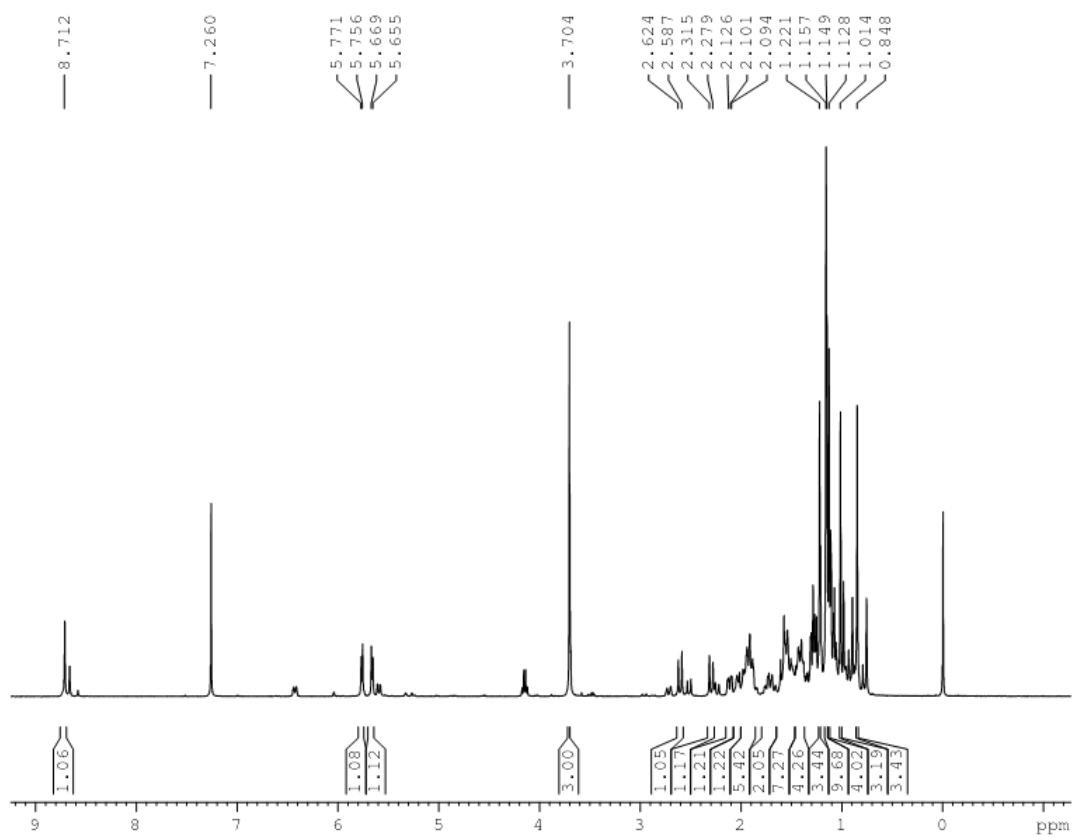

$^1\text{H}$  NMR spectra of compound **7e**



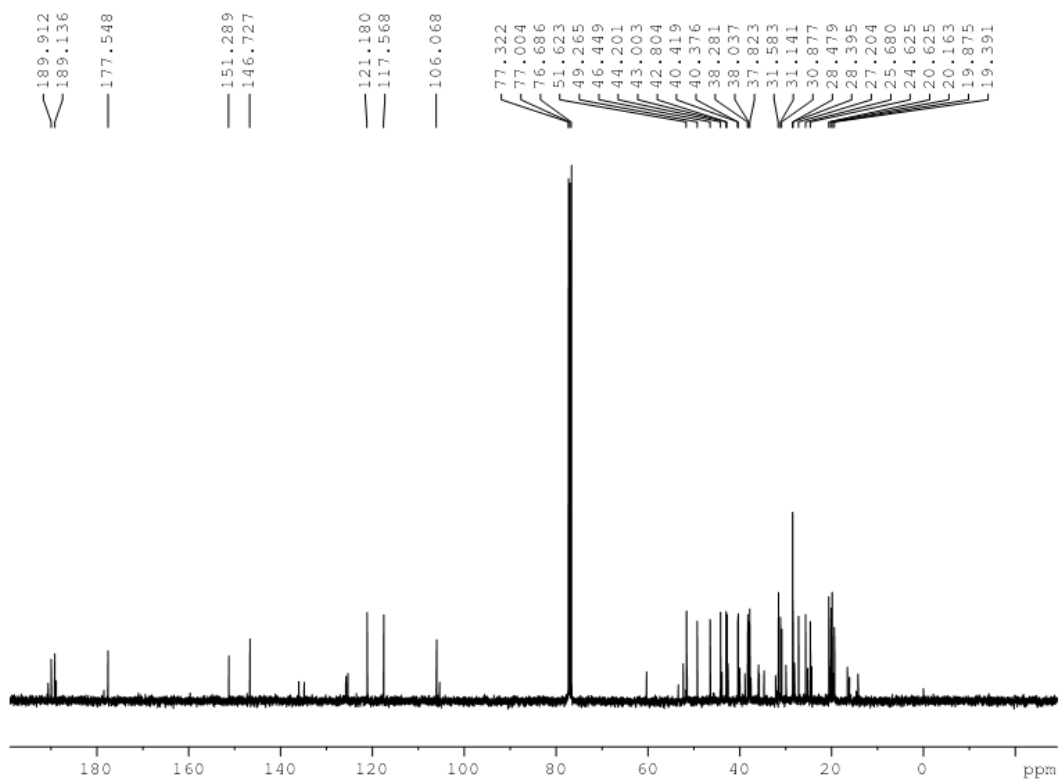

$^{13}\text{C}$  NMR spectra of compound **7e**

Compound **8c**

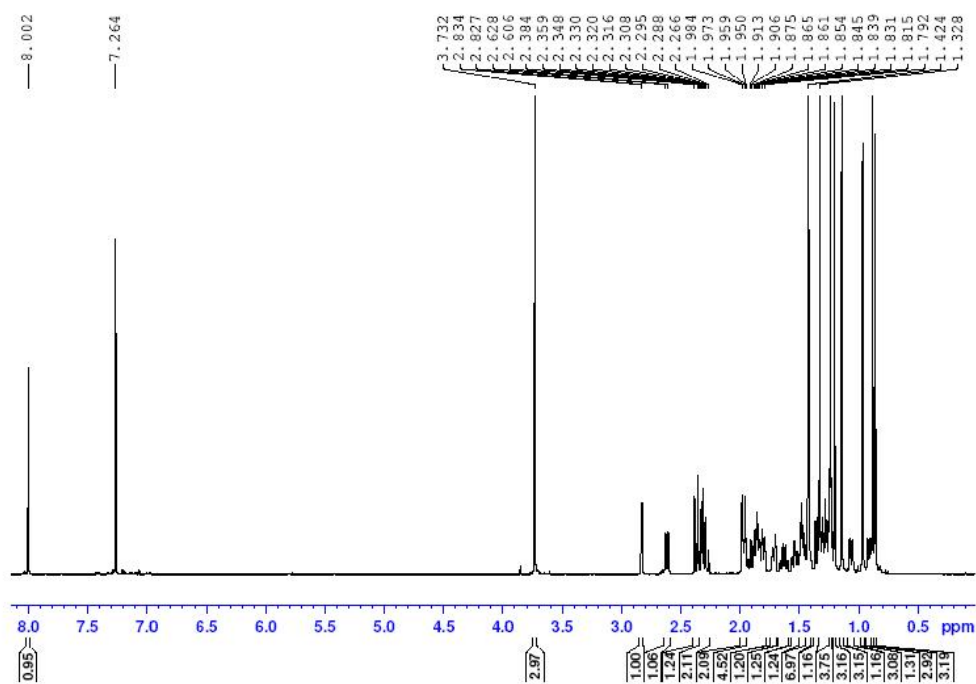

$^1\text{H}$  NMR spectra of compound **8c**

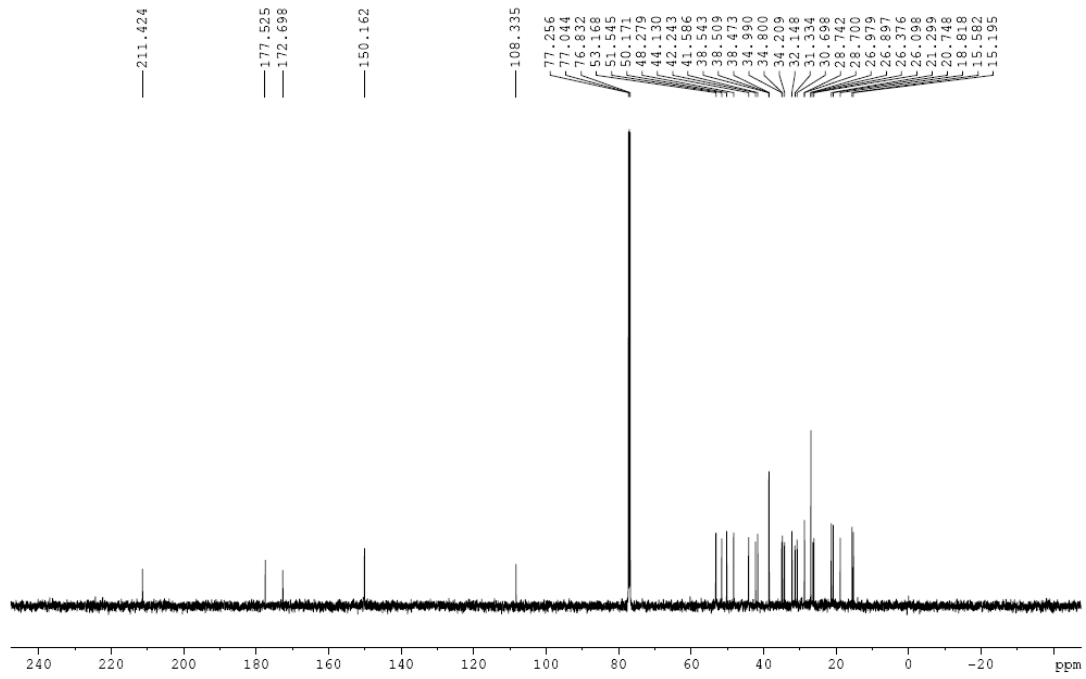

$^{13}\text{C}$  NMR spectra of compound **8c**

Compound **8e**

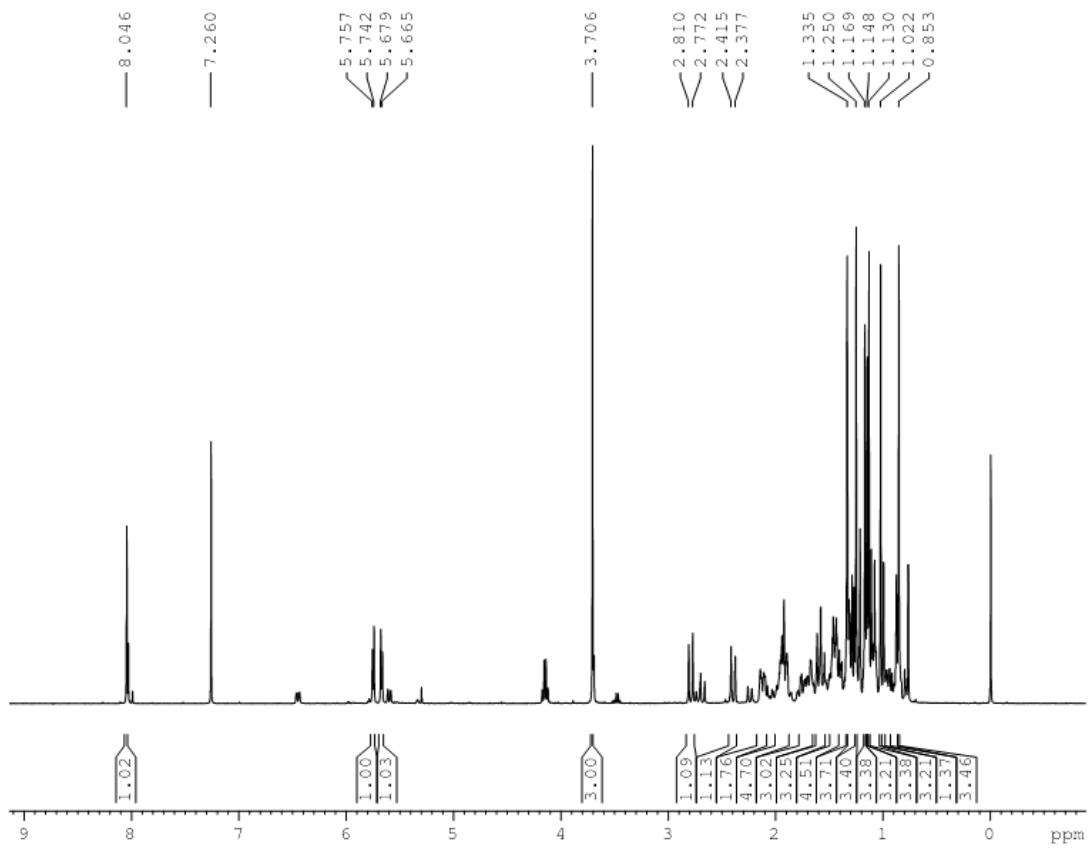

$^1\text{H}$  NMR spectra of compound **8e**

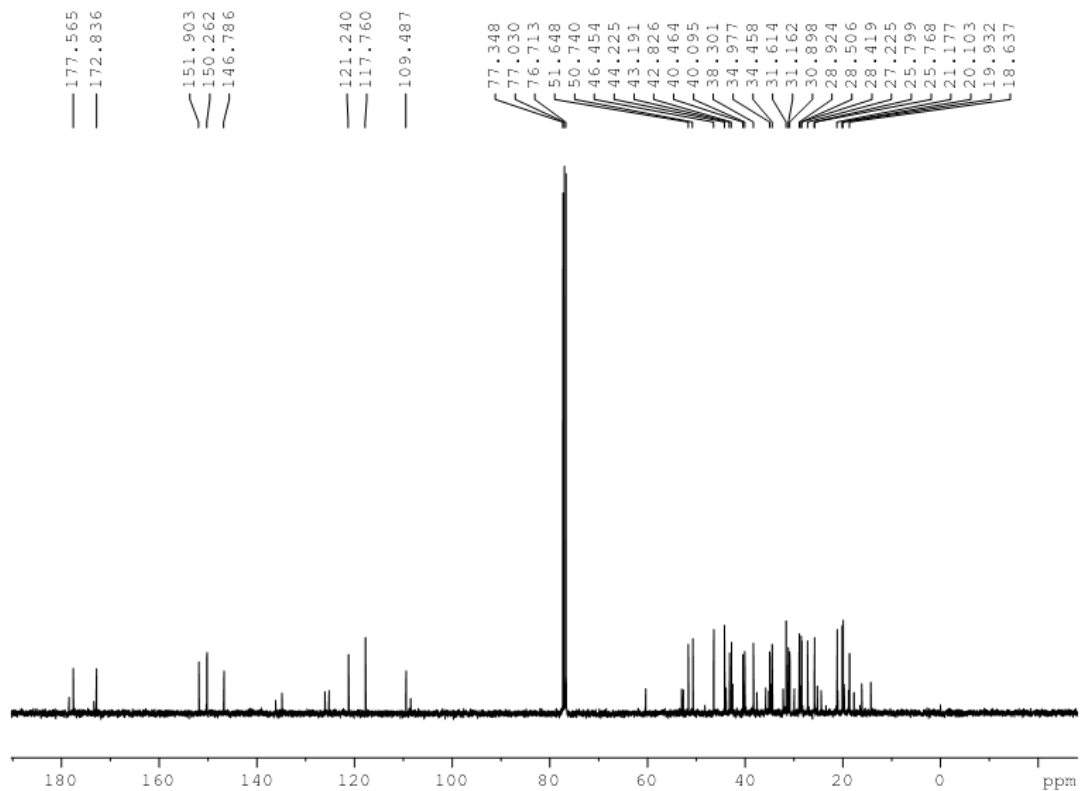

$^{13}\text{C}$  NMR spectra of compound **8e**
